# Supplementary material for: Pivalate complexes of copper(ii) with aliphatic amines as potential precursors for depositing nanomaterials from the gas phase
Source: Royal Society of Chemistry journal article supplement (doi:10.1039/d3nj04959k), 2024-01-01
Supplement: d3nj04959k1.pdf [file d3nj04959k1.pdf]

Supplementary Materials:

***Pivalate complexes of copper(II) with aliphatic amines as potential precursors for depositing nanomaterials from the gas phase***

***A. Butrymowicz-Kubiak, W. Luba, K. Madajska, T. Muzioł, I. B. Szymańska\****

*Faculty of Chemistry, Nicolaus Copernicus University in Toruń, Gagarina 7, 87-100 Toruń, Poland*

**X-ray crystal structure determination**

**Table S1** Crystal data and structure refinement for (1a–4a).

| Identification code                              | (1a)                                                                                                        | (2a)                                                                                                        | (3a)                                                                                                                       | (4a)                                                                                                 |
|--------------------------------------------------|-------------------------------------------------------------------------------------------------------------|-------------------------------------------------------------------------------------------------------------|----------------------------------------------------------------------------------------------------------------------------|------------------------------------------------------------------------------------------------------|
| Empirical formula                                | C <sub>38</sub> H <sub>76</sub> Cu <sub>3</sub> N <sub>2</sub> O <sub>12</sub>                              | C <sub>38</sub> H <sub>76</sub> Cu <sub>3</sub> N <sub>2</sub> O <sub>12</sub>                              | C <sub>26</sub> H <sub>56</sub> Cu <sub>3</sub> N <sub>2</sub> O <sub>10</sub>                                             | C <sub>82</sub> H <sub>207</sub> Cu <sub>20</sub> N <sub>7</sub> O <sub>72</sub>                     |
| Formula weight                                   | 943.62                                                                                                      | 943.62                                                                                                      | 747.34                                                                                                                     | 3732.48                                                                                              |
| Temperature [K]                                  | 100(2) K                                                                                                    | 100(2) K                                                                                                    | 100(2) K                                                                                                                   | 100(2) K                                                                                             |
| Wavelength [Å]                                   | 1.54184 Å                                                                                                   | 1.54184 Å                                                                                                   | 1.54184 Å                                                                                                                  | 1.54184 Å                                                                                            |
| Crystal system, space group                      | Monoclinic, P2 <sub>1</sub> /n                                                                              | Monoclinic, P2 <sub>1</sub> /n                                                                              | Triclinic, P $\bar{1}$                                                                                                     | Orthorhombic, Pbca                                                                                   |
| Unit cell dimensions [Å] and [°]                 | a = 11.6627(5) Å $\alpha$ = 90°<br>b = 12.4671(6) Å $\beta$ = 92.366(4)°<br>c = 16.7859(9) Å $\gamma$ = 90° | a = 12.5325(5) Å $\alpha$ = 90°<br>b = 11.1446(4) Å $\beta$ = 94.728(4)°<br>c = 17.1279(7) Å $\gamma$ = 90° | a = 6.2514(12) Å $\alpha$ = 109.72(2)°<br>b = 12.462(4) Å $\beta$ = 99.887(15)°<br>c = 12.7926(14) Å $\gamma$ = 103.83(2)° | a = 20.1618(5) Å $\alpha$ = 90°<br>b = 25.4106(6) Å $\beta$ = 90°<br>c = 28.8931(7) Å $\gamma$ = 90° |
| Volume [Å <sup>3</sup> ]                         | 2438.6(2) Å <sup>3</sup>                                                                                    | 2384.10(17) Å <sup>3</sup>                                                                                  | 875.5(4) Å <sup>3</sup>                                                                                                    | 14802.6(6) Å <sup>3</sup>                                                                            |
| Z, Calculated density [Mg×m <sup>-3</sup> ]      | 2, 1.285 Mg/m <sup>3</sup>                                                                                  | 2, 1.314 Mg/m <sup>3</sup>                                                                                  | 1, 1.417 Mg/m <sup>3</sup>                                                                                                 | 4, 1.675 Mg/m <sup>3</sup>                                                                           |
| Absorption coefficient [mm <sup>-1</sup> ]       | 1.958 mm <sup>-1</sup>                                                                                      | 2.002 mm <sup>-1</sup>                                                                                      | 2.532 mm <sup>-1</sup>                                                                                                     | 3.784 mm <sup>-1</sup>                                                                               |
| F(000)                                           | 1002                                                                                                        | 1002                                                                                                        | 393                                                                                                                        | 7688                                                                                                 |
| Crystal size [mm]                                | 0.160 x 0.100 x 0.040 mm <sup>3</sup>                                                                       | 0.130 x 0.060 x 0.040 mm <sup>3</sup>                                                                       | 0.100 x 0.030 x 0.020 mm <sup>3</sup>                                                                                      | 0.080 x 0.050 x 0.030 mm <sup>3</sup>                                                                |
| Theta range for data collection [°]              | 2.635 to 74.499°                                                                                            | 4.739 to 68.227°                                                                                            | 3.819 to 68.199°                                                                                                           | 3.189 to 74.501°                                                                                     |
| Limiting indices                                 | -13 ≤ h ≤ 14,<br>-15 ≤ k ≤ 15,<br>-20 ≤ l ≤ 20                                                              | -15 ≤ h ≤ 15,<br>-13 ≤ k ≤ 13,<br>-20 ≤ l ≤ 20                                                              | -7 ≤ h ≤ 6,<br>-13 ≤ k ≤ 13,<br>-20 ≤ l ≤ 20                                                                               | -12 ≤ h ≤ 25,<br>-31 ≤ k ≤ 31,<br>-34 ≤ l ≤ 35                                                       |
| Reflections collected/unique                     | 18846                                                                                                       | 6871                                                                                                        | 6231                                                                                                                       | 59548                                                                                                |
| Completeness [%] to theta [°]                    | 99.9 %                                                                                                      | 98.0 %                                                                                                      | 88.7 %                                                                                                                     | 99.7 %                                                                                               |
| Absorption correction                            | Gaussian                                                                                                    | Analytical                                                                                                  | Gaussian                                                                                                                   | Gaussian                                                                                             |
| Max. and min. transmission                       | 1.000 and 0.618                                                                                             | 0.921 and 0.798                                                                                             | 1.000 and 0.806                                                                                                            | 0.932 and 0.816                                                                                      |
| Refinement method                                | Full-matrix least-squares on F <sup>2</sup>                                                                 | Full-matrix least-squares on F <sup>2</sup>                                                                 | Full-matrix least-squares on F <sup>2</sup>                                                                                | Full-matrix least-squares on F <sup>2</sup>                                                          |
| Data/restraints/parameters                       | 4859 / 42 / 333                                                                                             | 6871 / 32 / 276                                                                                             | 2831 / 29 / 199                                                                                                            | 14603 / 51 / 898                                                                                     |
| Goodness-of-fit on F <sup>2</sup>                | 1.025                                                                                                       | 1.034                                                                                                       | 1.032                                                                                                                      | 1.045                                                                                                |
| Final R Indices [I > 2σ(I)]                      | R1 = 0.0478, wR2 = 0.1244                                                                                   | R1 = 0.0716, wR2 = 0.1940                                                                                   | R1 = 0.1094, wR2 = 0.2815                                                                                                  | R1 = 0.0432, wR2 = 0.1240                                                                            |
| R indices (all data)                             | R1 = 0.0528, wR2 = 0.1275                                                                                   | R1 = 0.0934, wR2 = 0.2117                                                                                   | R1 = 0.1846, wR2 = 0.3288                                                                                                  | R1 = 0.0486, wR2 = 0.1277                                                                            |
| Largest diff. peak and hole [e.Å <sup>-3</sup> ] | 0.684 and -0.790 e.Å <sup>-3</sup>                                                                          | 1.036 and -0.601 e.Å <sup>-3</sup>                                                                          | 1.919 and -1.063 e.Å <sup>-3</sup>                                                                                         | 1.635 and -0.898 e.Å <sup>-3</sup>                                                                   |

**Table S2** Bond lengths [Å] and angles [°] for [Cu<sub>3</sub>(<sup>t</sup>BuNH<sub>2</sub>)<sub>2</sub>(μ-O<sub>2</sub>C<sup>t</sup>Bu)<sub>6</sub>]<sub>n</sub> (**1a**).

---

|                       |            |
|-----------------------|------------|
| Cu(1)-O(1)            | 1.947(2)   |
| Cu(1)-O(2)#1          | 1.954(2)   |
| Cu(1)-O(12)#1         | 1.973(2)   |
| Cu(1)-O(11)           | 1.977(2)   |
| Cu(1)-O(22)           | 2.136(2)   |
| Cu(1)-Cu(1)#1         | 2.6022(8)  |
| Cu(2)-O(21)           | 1.964(2)   |
| Cu(2)-O(21)#2         | 1.964(2)   |
| Cu(2)-N(31)#2         | 1.994(3)   |
| Cu(2)-N(31)           | 1.994(3)   |
| O(1)-Cu(1)-O(2)#1     | 169.07(9)  |
| O(1)-Cu(1)-O(12)#1    | 90.79(10)  |
| O(2)#1-Cu(1)-O(12)#1  | 88.89(10)  |
| O(1)-Cu(1)-O(11)      | 89.67(10)  |
| O(2)#1-Cu(1)-O(11)    | 88.54(10)  |
| O(12)#1-Cu(1)-O(11)   | 168.77(9)  |
| O(1)-Cu(1)-O(22)      | 93.74(10)  |
| O(2)#1-Cu(1)-O(22)    | 97.00(10)  |
| O(12)#1-Cu(1)-O(22)   | 102.40(8)  |
| O(11)-Cu(1)-O(22)     | 88.76(8)   |
| O(21)-Cu(2)-O(21)#2   | 180.0      |
| O(21)-Cu(2)-N(31)#2   | 84.95(10)  |
| O(21)#2-Cu(2)-N(31)#2 | 95.05(10)  |
| O(21)-Cu(2)-N(31)     | 95.05(10)  |
| O(21)#2-Cu(2)-N(31)   | 84.95(10)  |
| N(31)#2-Cu(2)-N(31)   | 180.00(14) |

---

Symmetry transformations used to generate equivalent atoms:

#1 -x+1,-y+1,-z+1 #2 -x+2,-y+1,-z+1

**Table S3** Bonds lengths [Å] and angles [°] for  $[\text{Cu}_3(\text{sBuNH}_2)_2(\mu\text{-O}_2\text{C}^t\text{Bu})_6]_n$  (**2a**).

---

|                       |            |
|-----------------------|------------|
| Cu(1)-O(12)#1         | 1.940(4)   |
| Cu(1)-O(11)           | 1.952(4)   |
| Cu(1)-O(2)#1          | 1.974(3)   |
| Cu(1)-O(1)            | 1.978(4)   |
| Cu(1)-O(21)           | 2.160(3)   |
| Cu(1)-Cu(1)#1         | 2.6277(13) |
| Cu(2)-O(22)           | 1.962(4)   |
| Cu(2)-O(22)#2         | 1.962(4)   |
| Cu(2)-N(31)           | 2.023(6)   |
| Cu(2)-N(31)#2         | 2.023(6)   |
| O(12)#1-Cu(1)-O(11)   | 168.46(16) |
| O(12)#1-Cu(1)-O(2)#1  | 90.93(19)  |
| O(11)-Cu(1)-O(2)#1    | 89.03(18)  |
| O(12)#1-Cu(1)-O(1)    | 89.3(2)    |
| O(11)-Cu(1)-O(1)      | 88.40(19)  |
| O(2)#1-Cu(1)-O(1)     | 168.12(15) |
| O(12)#1-Cu(1)-O(21)   | 95.69(16)  |
| O(11)-Cu(1)-O(21)     | 95.61(16)  |
| O(2)#1-Cu(1)-O(21)    | 101.92(14) |
| O(1)-Cu(1)-O(21)      | 89.88(14)  |
| O(12)#1-Cu(1)-Cu(1)#1 | 82.74(12)  |
| O(11)-Cu(1)-Cu(1)#1   | 85.86(12)  |
| O(2)#1-Cu(1)-Cu(1)#1  | 81.07(10)  |
| O(1)-Cu(1)-Cu(1)#1    | 87.18(11)  |
| O(21)-Cu(1)-Cu(1)#1   | 176.67(10) |
| O(22)-Cu(2)-O(22)#2   | 180.0      |
| O(22)-Cu(2)-N(31)     | 92.3(2)    |
| O(22)#2-Cu(2)-N(31)   | 87.7(2)    |
| O(22)-Cu(2)-N(31)#2   | 87.7(2)    |
| O(22)#2-Cu(2)-N(31)#2 | 92.3(2)    |
| N(31)-Cu(2)-N(31)#2   | 180.0      |
| C(2)-O(1)-Cu(1)       | 119.6(3)   |
| C(2)-O(2)-Cu(1)#1     | 127.2(3)   |
| C(12)-O(11)-Cu(1)     | 121.1(4)   |
| C(12)-O(12)-Cu(1)#1   | 125.1(4)   |
| C(22)-O(21)-Cu(1)     | 148.8(3)   |

|                    |          |
|--------------------|----------|
| C(22)-O(22)-Cu(2)  | 111.2(3) |
| C(32)-N(31)-Cu(2)  | 120.0(6) |
| Cu(2)-N(31)-H(31A) | 107.3    |
| Cu(2)-N(31)-H(31B) | 107.3    |
| Cu(2)-N(31)-H(31C) | 107.3    |
| Cu(2)-N(31)-H(31D) | 107.3    |

---

Symmetry transformations used to generate equivalent atoms:

#1  $-x+1, -y+1, -z+1$  #2  $-x+1, -y+2, -z+1$

**Table S4** Bonds lengths [Å] and angles [°] for [Cu<sub>3</sub>(<sup>i</sup>PrNH<sub>2</sub>)<sub>2</sub>(μ<sub>3</sub>-OH)<sub>2</sub>(μ-O<sub>2</sub>C<sup>t</sup>Bu)<sub>4</sub>]<sub>n</sub> (**3a**).

---

|                       |          |
|-----------------------|----------|
| Cu(1)-O(31)#1         | 1.951(6) |
| Cu(1)-O(31)           | 1.951(6) |
| Cu(1)-O(11)#1         | 1.975(8) |
| Cu(1)-O(11)           | 1.975(7) |
| Cu(2)-O(31)           | 1.936(7) |
| Cu(2)-O(1)            | 1.950(9) |
| Cu(2)-N(21)           | 1.990(8) |
| Cu(2)-O(12)#1         | 2.083(9) |
| Cu(2)-O(31)#2         | 2.127(7) |
| O(31)#1-Cu(1)-O(31)   | 180.0(5) |
| O(31)#1-Cu(1)-O(11)#1 | 83.6(3)  |
| O(31)-Cu(1)-O(11)#1   | 96.4(3)  |
| O(31)#1-Cu(1)-O(11)   | 96.4(3)  |
| O(31)-Cu(1)-O(11)     | 83.6(3)  |
| O(11)#1-Cu(1)-O(11)   | 180.0    |
| O(31)-Cu(2)-O(1)      | 93.0(3)  |
| O(31)-Cu(2)-N(21)     | 171.3(4) |
| O(1)-Cu(2)-N(21)      | 94.1(4)  |
| O(31)-Cu(2)-O(12)#1   | 92.8(3)  |
| O(1)-Cu(2)-O(12)#1    | 140.0(3) |
| N(21)-Cu(2)-O(12)#1   | 85.1(4)  |
| O(31)-Cu(2)-O(31)#2   | 81.6(3)  |
| O(1)-Cu(2)-O(31)#2    | 135.1(3) |
| N(21)-Cu(2)-O(31)#2   | 89.8(3)  |
| O(12)#1-Cu(2)-O(31)#2 | 84.8(3)  |
| C(2)-O(1)-Cu(2)       | 115.6(8) |
| Cu(2)-O(31)-Cu(1)     | 112.9(4) |
| Cu(2)-O(31)-Cu(2)#2   | 98.4(3)  |
| Cu(1)-O(31)-Cu(2)#2   | 131.1(4) |
| Cu(2)-O(31)-H(31)     | 103.9    |
| Cu(1)-O(31)-H(31)     | 103.9    |
| Cu(2)#2-O(31)-H(31)   | 103.9    |

---

Symmetry transformations used to generate equivalent atoms:

#1 -x+1,-y+1,-z+1 #2 -x+2,-y+1,-z+1

**Table S5** Bond lengths [ $\text{\AA}$ ] and angles [ $^\circ$ ] for  $[\text{Cu}_{20}(\text{EtNH}_2)_6(\mu_3\text{-OH})_{24}(\text{OH})(\text{H}_2\text{O})_5(\text{NO}_3)(\mu\text{-O}_2\text{C}^t\text{Bu})_8](^t\text{BuCO}_2)_6 \cdot 13\text{H}_2\text{O}$  (**4a**).

---

|              |           |
|--------------|-----------|
| Cu(1)-O(1)   | 1.924(3)  |
| Cu(1)-N(81)  | 1.976(3)  |
| Cu(1)-O(105) | 1.986(2)  |
| Cu(1)-O(110) | 2.026(2)  |
| Cu(1)-O(101) | 2.274(2)  |
| Cu(1)-Cu(9)  | 2.9024(7) |
| Cu(1)-Cu(2)  | 2.9926(7) |
| Cu(2)-O(102) | 1.942(2)  |
| Cu(2)-O(101) | 1.944(2)  |
| Cu(2)-O(106) | 1.967(2)  |
| Cu(2)-O(105) | 1.982(2)  |
| Cu(2)-Cu(3)  | 3.0575(7) |
| Cu(3)-O(11)  | 1.935(2)  |
| Cu(3)-N(76)  | 1.983(3)  |
| Cu(3)-O(107) | 1.984(2)  |
| Cu(3)-O(106) | 2.010(2)  |
| Cu(3)-O(102) | 2.258(2)  |
| Cu(3)-Cu(10) | 2.9937(7) |
| Cu(3)-Cu(4)  | 3.0279(7) |
| Cu(4)-O(102) | 1.950(2)  |
| Cu(4)-O(108) | 1.959(3)  |
| Cu(4)-O(103) | 2.008(2)  |
| Cu(4)-O(107) | 2.016(2)  |
| Cu(4)-O(90)  | 2.374(4)  |
| Cu(4)-O(12)  | 2.414(2)  |
| Cu(4)-O(88)  | 2.428(4)  |
| Cu(5)-N(91)  | 1.987(4)  |
| Cu(5)-O(103) | 1.998(2)  |
| Cu(5)-O(85)  | 2.025(3)  |
| Cu(5)-O(109) | 2.044(3)  |
| Cu(5)-O(86)  | 2.289(4)  |
| Cu(5)-O(108) | 2.325(3)  |
| Cu(5)-Cu(6)  | 2.9733(7) |
| Cu(6)-O(104) | 1.932(2)  |
| Cu(6)-O(109) | 1.962(2)  |

|                     |            |
|---------------------|------------|
| Cu(6)-O(103)        | 1.978(2)   |
| Cu(6)-O(112)#1      | 1.995(2)   |
| Cu(6)-Cu(7)         | 3.0012(7)  |
| Cu(7)-O(21)         | 1.923(3)   |
| Cu(7)-O(31)         | 1.930(3)   |
| Cu(7)-O(111)        | 1.984(2)   |
| Cu(7)-O(112)#1      | 2.026(2)   |
| Cu(7)-O(104)        | 2.245(2)   |
| Cu(7)-Cu(8)         | 2.9532(7)  |
| Cu(7)-Cu(10)#1      | 2.9568(7)  |
| Cu(8)-O(101)        | 1.933(2)   |
| Cu(8)-O(104)        | 1.939(2)   |
| Cu(8)-O(110)        | 1.976(2)   |
| Cu(8)-O(111)        | 1.978(2)   |
| Cu(8)-O(32)         | 2.274(2)   |
| Cu(9)-O(108)#1      | 1.932(3)   |
| Cu(9)-O(105)        | 1.939(2)   |
| Cu(9)-O(110)        | 1.970(2)   |
| Cu(9)-O(109)#1      | 1.982(2)   |
| Cu(9)-O(90)#1       | 2.228(4)   |
| Cu(10)-O(111)#1     | 1.955(2)   |
| Cu(10)-O(107)       | 1.957(2)   |
| Cu(10)-O(106)       | 1.961(2)   |
| Cu(10)-O(112)       | 1.964(2)   |
| Cu(10)-O(88)        | 2.209(4)   |
| Cu(10)-O(89)        | 2.308(5)   |
| O(1)-Cu(1)-N(81)    | 94.63(12)  |
| O(1)-Cu(1)-O(105)   | 93.49(11)  |
| N(81)-Cu(1)-O(105)  | 170.65(11) |
| O(1)-Cu(1)-O(110)   | 166.22(11) |
| N(81)-Cu(1)-O(110)  | 92.03(11)  |
| O(105)-Cu(1)-O(110) | 79.07(9)   |
| O(1)-Cu(1)-O(101)   | 114.95(11) |
| N(81)-Cu(1)-O(101)  | 102.83(11) |
| O(105)-Cu(1)-O(101) | 77.80(8)   |
| O(110)-Cu(1)-O(101) | 75.09(8)   |
| O(1)-Cu(1)-Cu(9)    | 125.49(9)  |
| N(81)-Cu(1)-Cu(9)   | 129.02(9)  |

|                     |            |
|---------------------|------------|
| O(105)-Cu(1)-Cu(9)  | 41.68(7)   |
| O(110)-Cu(1)-Cu(9)  | 42.66(6)   |
| O(101)-Cu(1)-Cu(9)  | 88.39(6)   |
| O(1)-Cu(1)-Cu(2)    | 95.49(8)   |
| N(81)-Cu(1)-Cu(2)   | 142.22(9)  |
| O(105)-Cu(1)-Cu(2)  | 40.99(6)   |
| O(110)-Cu(1)-Cu(2)  | 86.52(6)   |
| O(101)-Cu(1)-Cu(2)  | 40.51(6)   |
| Cu(9)-Cu(1)-Cu(2)   | 70.552(17) |
| O(102)-Cu(2)-O(101) | 94.50(9)   |
| O(102)-Cu(2)-O(106) | 85.29(9)   |
| O(101)-Cu(2)-O(106) | 175.63(9)  |
| O(102)-Cu(2)-O(105) | 173.98(10) |
| O(101)-Cu(2)-O(105) | 86.27(9)   |
| O(106)-Cu(2)-O(105) | 94.39(9)   |
| O(102)-Cu(2)-Cu(1)  | 141.73(7)  |
| O(101)-Cu(2)-Cu(1)  | 49.44(7)   |
| O(106)-Cu(2)-Cu(1)  | 129.56(7)  |
| O(105)-Cu(2)-Cu(1)  | 41.10(6)   |
| O(102)-Cu(2)-Cu(3)  | 47.50(7)   |
| O(101)-Cu(2)-Cu(3)  | 138.04(7)  |
| O(106)-Cu(2)-Cu(3)  | 40.27(7)   |
| O(105)-Cu(2)-Cu(3)  | 133.55(7)  |
| Cu(1)-Cu(2)-Cu(3)   | 153.15(2)  |
| O(11)-Cu(3)-N(76)   | 91.26(13)  |
| O(11)-Cu(3)-O(107)  | 96.50(10)  |
| N(76)-Cu(3)-O(107)  | 167.95(13) |
| O(11)-Cu(3)-O(106)  | 175.55(10) |
| N(76)-Cu(3)-O(106)  | 93.11(12)  |
| O(107)-Cu(3)-O(106) | 79.05(9)   |
| O(11)-Cu(3)-O(102)  | 102.75(10) |
| N(76)-Cu(3)-O(102)  | 109.95(12) |
| O(107)-Cu(3)-O(102) | 77.35(9)   |
| O(106)-Cu(3)-O(102) | 76.47(9)   |
| O(11)-Cu(3)-Cu(10)  | 135.18(8)  |
| N(76)-Cu(3)-Cu(10)  | 129.64(11) |
| O(107)-Cu(3)-Cu(10) | 40.23(7)   |
| O(106)-Cu(3)-Cu(10) | 40.47(6)   |



|                     |            |
|---------------------|------------|
| O(102)-Cu(3)-Cu(10) | 81.80(6)   |
| O(11)-Cu(3)-Cu(4)   | 88.84(8)   |
| N(76)-Cu(3)-Cu(4)   | 148.68(11) |
| O(107)-Cu(3)-Cu(4)  | 41.20(7)   |
| O(106)-Cu(3)-Cu(4)  | 87.83(6)   |
| O(102)-Cu(3)-Cu(4)  | 40.08(6)   |
| Cu(10)-Cu(3)-Cu(4)  | 65.981(16) |
| O(11)-Cu(3)-Cu(2)   | 141.03(8)  |
| N(76)-Cu(3)-Cu(2)   | 94.96(10)  |
| O(107)-Cu(3)-Cu(2)  | 84.79(7)   |
| O(106)-Cu(3)-Cu(2)  | 39.24(6)   |
| O(102)-Cu(3)-Cu(2)  | 39.36(6)   |
| Cu(10)-Cu(3)-Cu(2)  | 62.880(15) |
| Cu(4)-Cu(3)-Cu(2)   | 66.714(16) |
| O(102)-Cu(4)-O(108) | 177.58(11) |
| O(102)-Cu(4)-O(103) | 98.42(9)   |
| O(108)-Cu(4)-O(103) | 83.25(10)  |
| O(102)-Cu(4)-O(107) | 84.18(9)   |
| O(108)-Cu(4)-O(107) | 94.21(10)  |
| O(103)-Cu(4)-O(107) | 176.80(10) |
| O(102)-Cu(4)-O(90)  | 102.84(13) |
| O(108)-Cu(4)-O(90)  | 75.66(13)  |
| O(103)-Cu(4)-O(90)  | 80.40(12)  |
| O(107)-Cu(4)-O(90)  | 100.89(12) |
| O(102)-Cu(4)-O(12)  | 91.79(9)   |
| O(108)-Cu(4)-O(12)  | 89.81(10)  |
| O(103)-Cu(4)-O(12)  | 94.85(9)   |
| O(107)-Cu(4)-O(12)  | 83.17(9)   |
| O(90)-Cu(4)-O(12)   | 165.10(12) |
| O(102)-Cu(4)-O(88)  | 77.86(12)  |
| O(108)-Cu(4)-O(88)  | 100.02(13) |
| O(103)-Cu(4)-O(88)  | 106.15(12) |
| O(107)-Cu(4)-O(88)  | 76.17(12)  |
| O(12)-Cu(4)-O(88)   | 157.65(12) |
| O(102)-Cu(4)-Cu(3)  | 48.19(7)   |
| O(108)-Cu(4)-Cu(3)  | 130.91(8)  |
| O(103)-Cu(4)-Cu(3)  | 141.13(7)  |
| O(107)-Cu(4)-Cu(3)  | 40.41(7)   |

|                       |            |
|-----------------------|------------|
| O(90)-Cu(4)-Cu(3)     | 121.15(11) |
| O(12)-Cu(4)-Cu(3)     | 71.00(6)   |
| O(88)-Cu(4)-Cu(3)     | 87.57(10)  |
| N(91)-Cu(5)-O(103)    | 171.17(15) |
| N(91)-Cu(5)-O(85)     | 94.03(16)  |
| O(103)-Cu(5)-O(85)    | 91.82(11)  |
| N(91)-Cu(5)-O(109)    | 94.82(15)  |
| O(103)-Cu(5)-O(109)   | 79.18(9)   |
| O(85)-Cu(5)-O(109)    | 170.97(11) |
| N(91)-Cu(5)-O(86)     | 85.19(18)  |
| O(103)-Cu(5)-O(86)    | 101.40(13) |
| O(85)-Cu(5)-O(86)     | 90.40(16)  |
| O(109)-Cu(5)-O(86)    | 92.10(14)  |
| N(91)-Cu(5)-O(108)    | 97.60(15)  |
| O(103)-Cu(5)-O(108)   | 74.69(9)   |
| O(85)-Cu(5)-O(108)    | 101.80(11) |
| O(109)-Cu(5)-O(108)   | 75.26(9)   |
| O(86)-Cu(5)-O(108)    | 167.22(14) |
| N(91)-Cu(5)-Cu(6)     | 134.56(13) |
| O(103)-Cu(5)-Cu(6)    | 41.36(7)   |
| O(85)-Cu(5)-Cu(6)     | 130.62(10) |
| O(109)-Cu(5)-Cu(6)    | 41.02(7)   |
| O(86)-Cu(5)-Cu(6)     | 86.39(10)  |
| O(108)-Cu(5)-Cu(6)    | 82.77(7)   |
| O(104)-Cu(6)-O(109)   | 175.49(10) |
| O(104)-Cu(6)-O(103)   | 93.87(10)  |
| O(109)-Cu(6)-O(103)   | 81.69(10)  |
| O(104)-Cu(6)-O(112)#1 | 87.07(10)  |
| O(109)-Cu(6)-O(112)#1 | 97.39(10)  |
| O(103)-Cu(6)-O(112)#1 | 178.37(10) |
| O(104)-Cu(6)-Cu(5)    | 132.86(7)  |
| O(109)-Cu(6)-Cu(5)    | 43.16(7)   |
| O(103)-Cu(6)-Cu(5)    | 41.87(7)   |
| O(112)#1-Cu(6)-Cu(5)  | 136.80(7)  |
| O(104)-Cu(6)-Cu(7)    | 48.40(7)   |
| O(109)-Cu(6)-Cu(7)    | 136.04(8)  |
| O(103)-Cu(6)-Cu(7)    | 138.28(7)  |
| O(112)#1-Cu(6)-Cu(7)  | 42.11(7)   |

|                         |            |
|-------------------------|------------|
| Cu(5)-Cu(6)-Cu(7)       | 152.75(2)  |
| O(21)-Cu(7)-O(31)       | 89.04(12)  |
| O(21)-Cu(7)-O(111)      | 175.83(11) |
| O(31)-Cu(7)-O(111)      | 93.30(10)  |
| O(21)-Cu(7)-O(112)#1    | 98.19(11)  |
| O(31)-Cu(7)-O(112)#1    | 168.22(12) |
| O(111)-Cu(7)-O(112)#1   | 78.95(9)   |
| O(21)-Cu(7)-O(104)      | 106.09(10) |
| O(31)-Cu(7)-O(104)      | 108.60(10) |
| O(111)-Cu(7)-O(104)     | 76.43(9)   |
| O(112)#1-Cu(7)-O(104)   | 78.43(9)   |
| O(21)-Cu(7)-Cu(8)       | 142.00(8)  |
| O(31)-Cu(7)-Cu(8)       | 87.09(8)   |
| O(111)-Cu(7)-Cu(8)      | 41.72(6)   |
| O(112)#1-Cu(7)-Cu(8)    | 92.79(7)   |
| O(104)-Cu(7)-Cu(8)      | 41.03(6)   |
| O(21)-Cu(7)-Cu(10)#1    | 135.28(9)  |
| O(31)-Cu(7)-Cu(10)#1    | 128.13(9)  |
| O(111)-Cu(7)-Cu(10)#1   | 40.98(6)   |
| O(112)#1-Cu(7)-Cu(10)#1 | 41.38(7)   |
| O(104)-Cu(7)-Cu(10)#1   | 86.44(6)   |
| Cu(8)-Cu(7)-Cu(10)#1    | 72.434(17) |
| O(21)-Cu(7)-Cu(6)       | 93.99(8)   |
| O(31)-Cu(7)-Cu(6)       | 147.87(9)  |
| O(111)-Cu(7)-Cu(6)      | 85.88(7)   |
| O(112)#1-Cu(7)-Cu(6)    | 41.33(7)   |
| O(104)-Cu(7)-Cu(6)      | 40.06(6)   |
| Cu(8)-Cu(7)-Cu(6)       | 71.062(17) |
| Cu(10)#1-Cu(7)-Cu(6)    | 68.152(16) |
| O(101)-Cu(8)-O(104)     | 96.68(9)   |
| O(101)-Cu(8)-O(110)     | 84.47(9)   |
| O(104)-Cu(8)-O(110)     | 170.67(9)  |
| O(101)-Cu(8)-O(111)     | 171.84(9)  |
| O(104)-Cu(8)-O(111)     | 84.13(9)   |
| O(110)-Cu(8)-O(111)     | 93.43(9)   |
| O(101)-Cu(8)-O(32)      | 99.48(9)   |
| O(104)-Cu(8)-O(32)      | 96.61(9)   |
| O(110)-Cu(8)-O(32)      | 92.32(9)   |

|                         |            |
|-------------------------|------------|
| O(111)-Cu(8)-O(32)      | 88.47(9)   |
| O(101)-Cu(8)-Cu(7)      | 142.49(7)  |
| O(104)-Cu(8)-Cu(7)      | 49.48(7)   |
| O(110)-Cu(8)-Cu(7)      | 131.74(7)  |
| O(111)-Cu(8)-Cu(7)      | 41.89(6)   |
| O(32)-Cu(8)-Cu(7)       | 73.41(6)   |
| O(108)#1-Cu(9)-O(105)   | 172.57(11) |
| O(108)#1-Cu(9)-O(110)   | 95.34(10)  |
| O(105)-Cu(9)-O(110)     | 81.61(9)   |
| O(108)#1-Cu(9)-O(109)#1 | 86.30(11)  |
| O(105)-Cu(9)-O(109)#1   | 94.99(10)  |
| O(110)-Cu(9)-O(109)#1   | 165.67(10) |
| O(108)#1-Cu(9)-O(90)#1  | 79.80(13)  |
| O(105)-Cu(9)-O(90)#1    | 107.56(13) |
| O(110)-Cu(9)-O(90)#1    | 107.19(13) |
| O(109)#1-Cu(9)-O(90)#1  | 87.12(13)  |
| O(108)#1-Cu(9)-Cu(1)    | 131.25(8)  |
| O(105)-Cu(9)-Cu(1)      | 42.95(7)   |
| O(110)-Cu(9)-Cu(1)      | 44.20(7)   |
| O(109)#1-Cu(9)-Cu(1)    | 126.16(7)  |
| O(90)#1-Cu(9)-Cu(1)     | 130.07(11) |
| O(111)#1-Cu(10)-O(107)  | 95.08(10)  |
| O(111)#1-Cu(10)-O(106)  | 168.79(9)  |
| O(107)-Cu(10)-O(106)    | 80.89(9)   |
| O(111)#1-Cu(10)-O(112)  | 81.17(9)   |
| O(107)-Cu(10)-O(112)    | 165.02(10) |
| O(106)-Cu(10)-O(112)    | 100.02(10) |
| O(111)#1-Cu(10)-O(88)   | 102.65(13) |
| O(107)-Cu(10)-O(88)     | 82.76(13)  |
| O(106)-Cu(10)-O(88)     | 87.29(13)  |
| O(112)-Cu(10)-O(88)     | 112.20(14) |
| O(111)#1-Cu(10)-O(89)   | 99.84(14)  |
| O(107)-Cu(10)-O(89)     | 113.74(14) |
| O(106)-Cu(10)-O(89)     | 91.35(14)  |
| O(112)-Cu(10)-O(89)     | 81.22(14)  |
| O(111)#1-Cu(10)-Cu(7)#1 | 41.73(7)   |
| O(107)-Cu(10)-Cu(7)#1   | 127.58(7)  |
| O(106)-Cu(10)-Cu(7)#1   | 134.62(7)  |

|                       |            |
|-----------------------|------------|
| O(112)-Cu(10)-Cu(7)#1 | 42.99(7)   |
| O(88)-Cu(10)-Cu(7)#1  | 126.25(11) |
| O(111)#1-Cu(10)-Cu(3) | 131.29(7)  |
| O(107)-Cu(10)-Cu(3)   | 40.91(7)   |
| O(106)-Cu(10)-Cu(3)   | 41.69(7)   |
| O(112)-Cu(10)-Cu(3)   | 134.64(7)  |
| O(88)-Cu(10)-Cu(3)    | 92.59(11)  |
| O(89)-Cu(10)-Cu(3)    | 115.10(13) |
| Cu(7)#1-Cu(10)-Cu(3)  | 140.41(2)  |
| C(2)-O(1)-Cu(1)       | 121.3(2)   |
| C(12)-O(11)-Cu(3)     | 126.5(2)   |
| C(12)-O(12)-Cu(4)     | 127.1(2)   |
| C(22)-O(21)-Cu(7)     | 123.4(2)   |
| C(32)-O(31)-Cu(7)     | 125.8(2)   |
| C(32)-O(32)-Cu(8)     | 126.7(2)   |
| C(79)-N(76)-Cu(3)     | 125.0(5)   |
| C(77)-N(76)-Cu(3)     | 118.3(4)   |
| Cu(3)-N(76)-H(76B)    | 107.7      |
| Cu(3)-N(76)-H(76C)    | 106.1      |
| Cu(3)-N(76)-H(76D)    | 106.1      |
| C(82)-N(81)-Cu(1)     | 119.6(2)   |
| Cu(1)-N(81)-H(81A)    | 107.4      |
| Cu(1)-N(81)-H(81B)    | 107.4      |
| C(92)-N(91)-Cu(5)     | 107.3(6)   |
| C(94)-N(91)-Cu(5)     | 122.1(7)   |
| Cu(5)-N(91)-H(91A)    | 110.3      |
| Cu(5)-N(91)-H(91B)    | 110.3      |
| Cu(5)-N(91)-H(91C)    | 106.8      |
| Cu(5)-N(91)-H(91D)    | 106.8      |
| N(87)-O(88)-Cu(10)    | 123.7(3)   |
| N(87)-O(88)-Cu(4)     | 130.3(3)   |
| Cu(10)-O(88)-Cu(4)    | 89.85(15)  |
| N(87)-O(89)-Cu(10)    | 120.2(3)   |
| N(87)-O(90)-Cu(9)#1   | 124.1(3)   |
| N(87)-O(90)-Cu(4)     | 132.1(3)   |
| Cu(9)#1-O(90)-Cu(4)   | 90.24(15)  |
| Cu(5)-O(85)-H(85A)    | 117.8      |
| Cu(5)-O(85)-H(85B)    | 125.0      |

|                      |            |
|----------------------|------------|
| Cu(5)-O(86)-H(86A)   | 113.3      |
| Cu(5)-O(86)-H(86B)   | 136.5      |
| Cu(8)-O(101)-Cu(2)   | 117.71(11) |
| Cu(8)-O(101)-Cu(1)   | 94.55(9)   |
| Cu(2)-O(101)-Cu(1)   | 90.05(8)   |
| Cu(8)-O(101)-H(101)  | 116.4      |
| Cu(2)-O(101)-H(101)  | 116.4      |
| Cu(1)-O(101)-H(101)  | 116.4      |
| Cu(2)-O(102)-Cu(4)   | 118.56(12) |
| Cu(2)-O(102)-Cu(3)   | 93.14(9)   |
| Cu(4)-O(102)-Cu(3)   | 91.73(9)   |
| Cu(2)-O(102)-H(102)  | 116.0      |
| Cu(4)-O(102)-H(102)  | 116.0      |
| Cu(3)-O(102)-H(102)  | 116.0      |
| Cu(6)-O(103)-Cu(5)   | 96.77(10)  |
| Cu(6)-O(103)-Cu(4)   | 113.43(11) |
| Cu(5)-O(103)-Cu(4)   | 102.14(10) |
| Cu(6)-O(103)-H(103)  | 114.2      |
| Cu(5)-O(103)-H(103)  | 114.2      |
| Cu(4)-O(103)-H(103)  | 114.2      |
| Cu(6)-O(104)-Cu(8)   | 126.74(12) |
| Cu(6)-O(104)-Cu(7)   | 91.54(9)   |
| Cu(8)-O(104)-Cu(7)   | 89.49(9)   |
| Cu(6)-O(104)-H(104)  | 113.9      |
| Cu(8)-O(104)-H(104)  | 113.9      |
| Cu(7)-O(104)-H(104)  | 113.9      |
| Cu(9)-O(105)-Cu(2)   | 120.59(12) |
| Cu(9)-O(105)-Cu(1)   | 95.37(10)  |
| Cu(2)-O(105)-Cu(1)   | 97.91(10)  |
| Cu(9)-O(105)-H(105)  | 113.4      |
| Cu(2)-O(105)-H(105)  | 113.4      |
| Cu(1)-O(105)-H(105)  | 113.4      |
| Cu(10)-O(106)-Cu(2)  | 106.95(10) |
| Cu(10)-O(106)-Cu(3)  | 97.84(10)  |
| Cu(2)-O(106)-Cu(3)   | 100.49(10) |
| Cu(10)-O(106)-H(106) | 116.3      |
| Cu(2)-O(106)-H(106)  | 116.3      |
| Cu(3)-O(106)-H(106)  | 116.3      |

|                        |            |
|------------------------|------------|
| Cu(10)-O(107)-Cu(3)    | 98.86(10)  |
| Cu(10)-O(107)-Cu(4)    | 111.23(11) |
| Cu(3)-O(107)-Cu(4)     | 98.39(10)  |
| Cu(10)-O(107)-H(107)   | 115.3      |
| Cu(3)-O(107)-H(107)    | 115.3      |
| Cu(4)-O(107)-H(107)    | 115.3      |
| Cu(9)#1-O(108)-Cu(4)   | 113.98(14) |
| Cu(9)#1-O(108)-Cu(5)   | 93.89(10)  |
| Cu(4)-O(108)-Cu(5)     | 92.98(10)  |
| Cu(9)#1-O(108)-H(108)  | 117.1      |
| Cu(4)-O(108)-H(108)    | 117.1      |
| Cu(5)-O(108)-H(108)    | 117.1      |
| Cu(6)-O(109)-Cu(9)#1   | 106.55(11) |
| Cu(6)-O(109)-Cu(5)     | 95.82(10)  |
| Cu(9)#1-O(109)-Cu(5)   | 101.69(11) |
| Cu(6)-O(109)-H(109)    | 116.6      |
| Cu(9)#1-O(109)-H(109)  | 116.6      |
| Cu(5)-O(109)-H(109)    | 116.6      |
| Cu(9)-O(110)-Cu(8)     | 118.16(11) |
| Cu(9)-O(110)-Cu(1)     | 93.14(9)   |
| Cu(8)-O(110)-Cu(1)     | 101.49(10) |
| Cu(9)-O(110)-H(110)    | 113.8      |
| Cu(8)-O(110)-H(110)    | 113.8      |
| Cu(1)-O(110)-H(110)    | 113.8      |
| Cu(10)#1-O(111)-Cu(8)  | 125.24(11) |
| Cu(10)#1-O(111)-Cu(7)  | 97.29(10)  |
| Cu(8)-O(111)-Cu(7)     | 96.40(10)  |
| Cu(10)#1-O(111)-H(111) | 111.6      |
| Cu(8)-O(111)-H(111)    | 111.6      |
| Cu(7)-O(111)-H(111)    | 111.6      |
| Cu(10)-O(112)-Cu(6)#1  | 114.97(12) |
| Cu(10)-O(112)-Cu(7)#1  | 95.63(10)  |
| Cu(6)#1-O(112)-Cu(7)#1 | 96.56(10)  |
| Cu(10)-O(112)-H(112)   | 115.5      |
| Cu(6)#1-O(112)-H(112)  | 115.5      |
| Cu(7)#1-O(112)-H(112)  | 115.5      |

---

Symmetry transformations used to generate equivalent atoms:

#1 -x+1,-y+1,-z+1

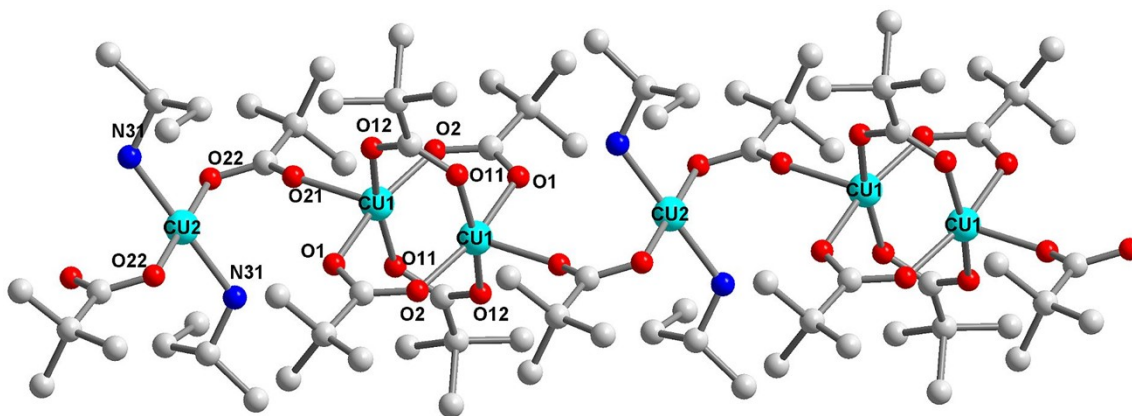

**Figure S1** Chain topology in  $[\text{Cu}_3(\text{s-BuNH}_2)_2(\mu\text{-O}_2\text{C}^t\text{Bu})_6]_n$  (**2a**) shows alternately arranged paddlewheel and mononuclear motifs.

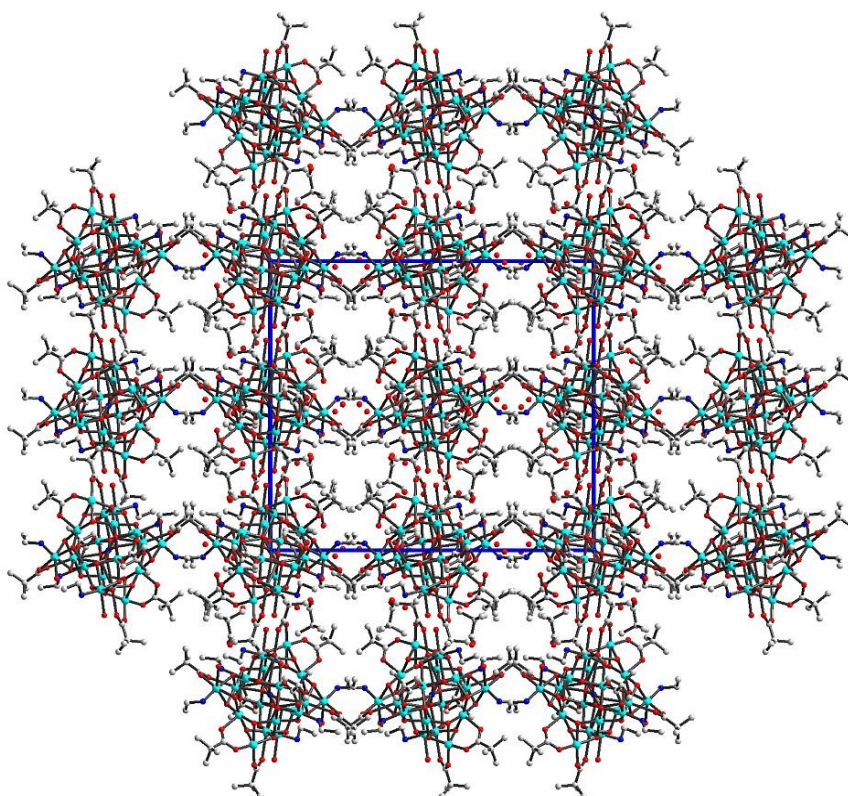

**Figure S 2** Packing diagram of  $[\text{Cu}_{20}(\text{EtNH}_2)_6(\mu_3\text{-OH})_{24}(\text{OH})(\text{H}_2\text{O})_5(\text{NO}_3)(\mu\text{-O}_2\text{C}^t\text{Bu})_8](\text{tBuCO}_2)_6 \cdot 13\text{H}_2\text{O}$  (**4a**) viewed along a axis. For the clarity of the picture hydrogen atoms are omitted.



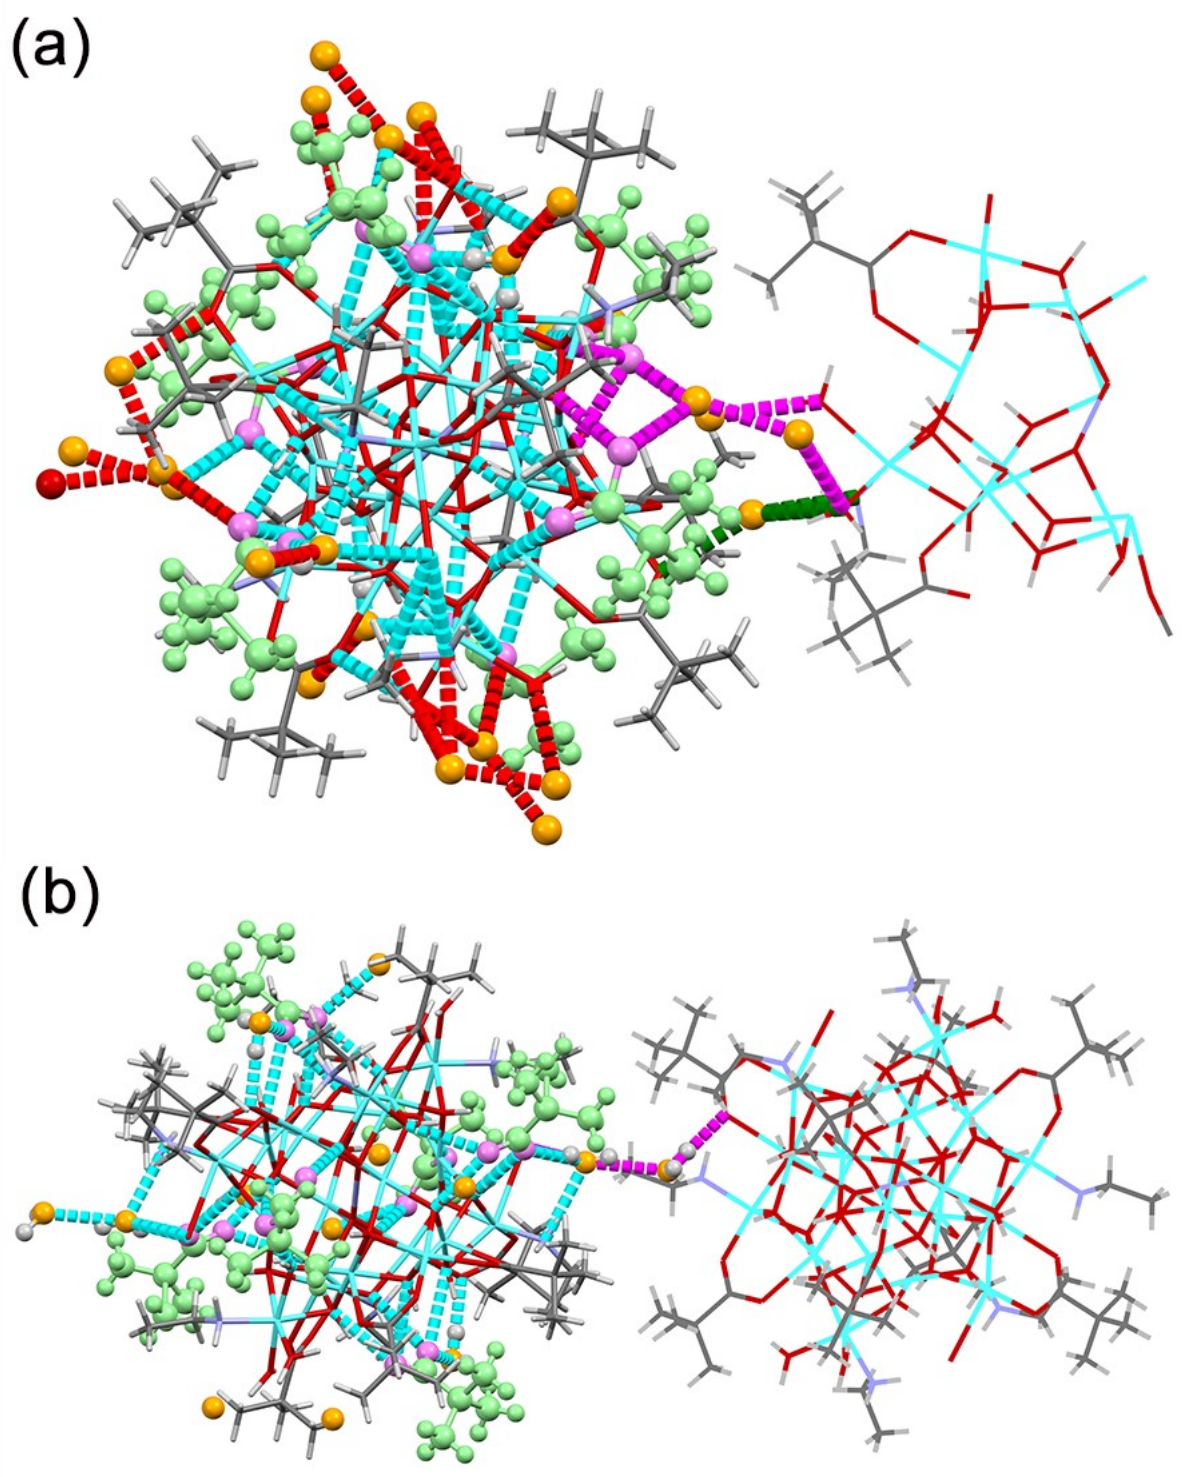

**Figure S 3** The solvation sphere around the cluster (a) and hydrogen bonds in the crystal network (b). The selected hydrogen bond pathways between clusters are marked in green (for cluster...solvation sphere...cluster pattern) and in magenta (for cluster...solvation sphere...solvation sphere...cluster pattern).

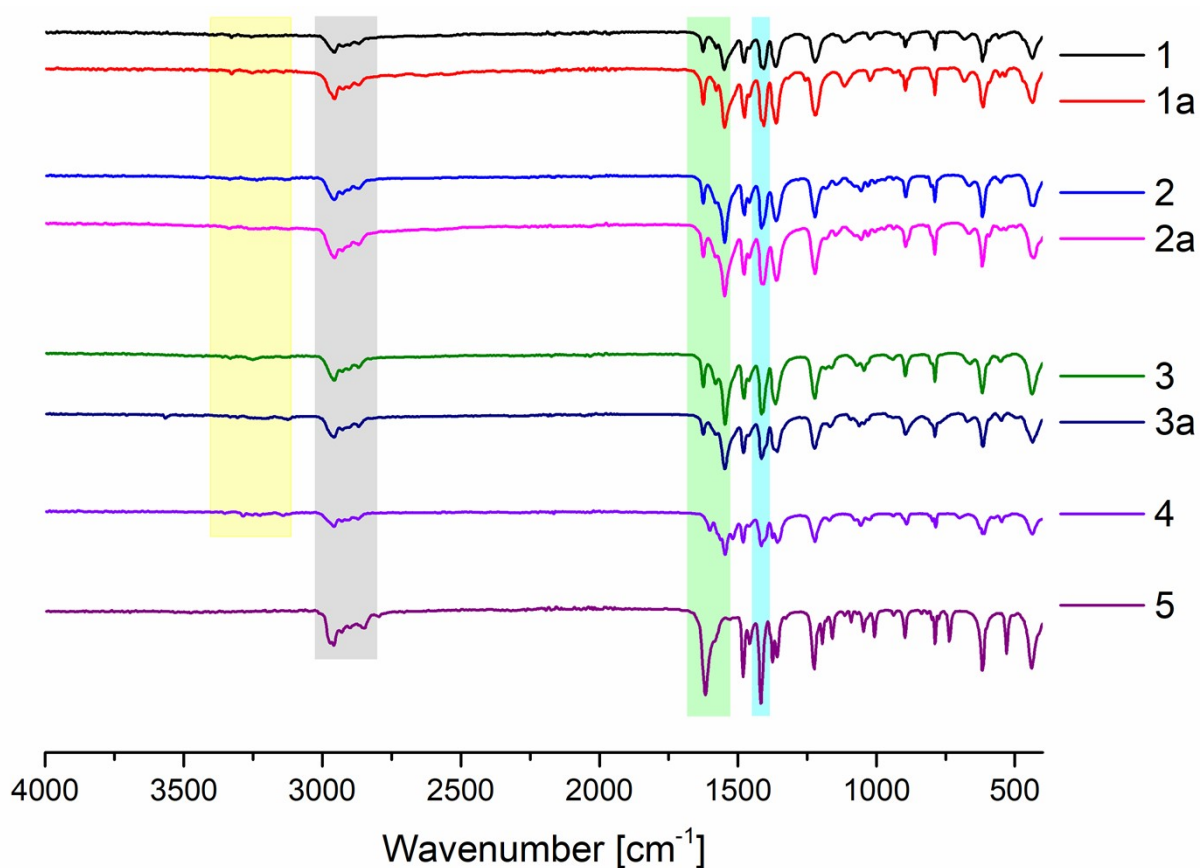

**Figure S 4** ATR-IR spectrum for the compounds in the general formulas:  $[\text{Cu}_2(\text{RNH}_2)_2(\mu\text{-O}_2\text{C}^t\text{Bu})_4]_n$  (**1–5**) and single crystals formed during crystallization (**1a–3a**). The coloured bands highlight the ranges of the particular vibrational modes: ( $\nu_{\text{NH}_2}$ ) (yellow), ( $\nu_{\text{asCOO}}$ ) (green), ( $\nu_{\text{sCOO}}$ ) (blue), ( $\nu_{\text{CH}_3}$ ) (grey).

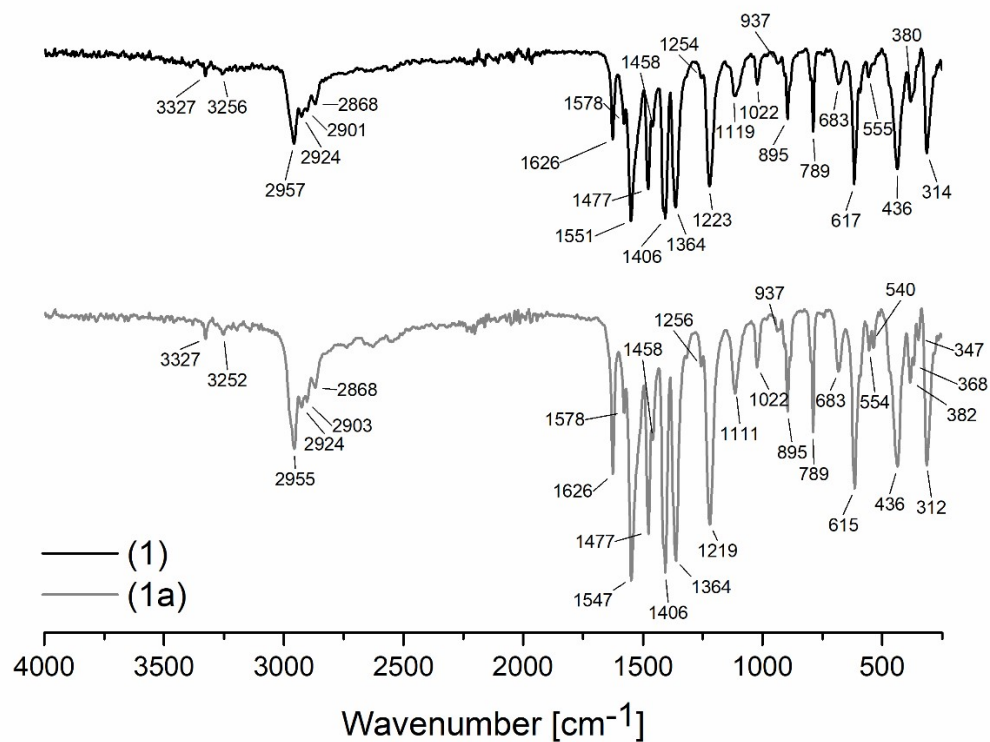

**Figure S5** ATR-IR spectrum for the compound  $[\text{Cu}_2(\text{tBuNH}_2)_2(\mu\text{-O}_2\text{C}^t\text{Bu})_4]_n$  (**1**) (black) and  $[\text{Cu}_3(\text{tBuNH}_2)_2(\mu\text{-O}_2\text{C}^t\text{Bu})_6]_n$  (**1a**) (grey).

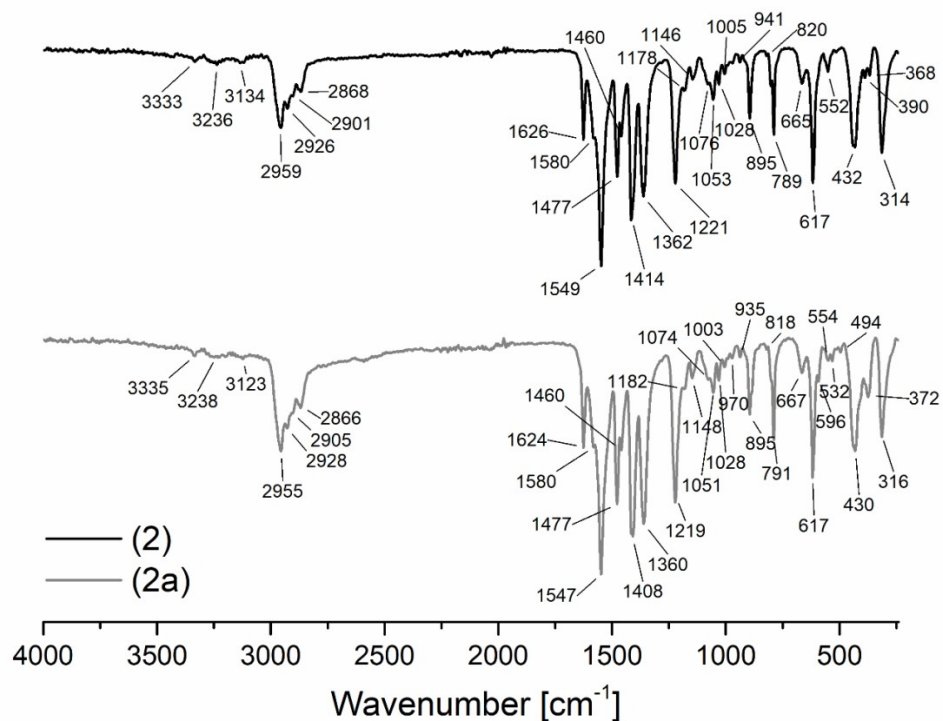

**Figure S6** ATR-IR spectrum for the compound  $[\text{Cu}_2(\text{sBuNH}_2)_2(\mu\text{-O}_2\text{C}^s\text{Bu})_4]_n$  (**2**) (black) and  $[\text{Cu}_3(\text{sBuNH}_2)_2(\mu\text{-O}_2\text{C}^s\text{Bu})_6]_n$  (**2a**) (grey).

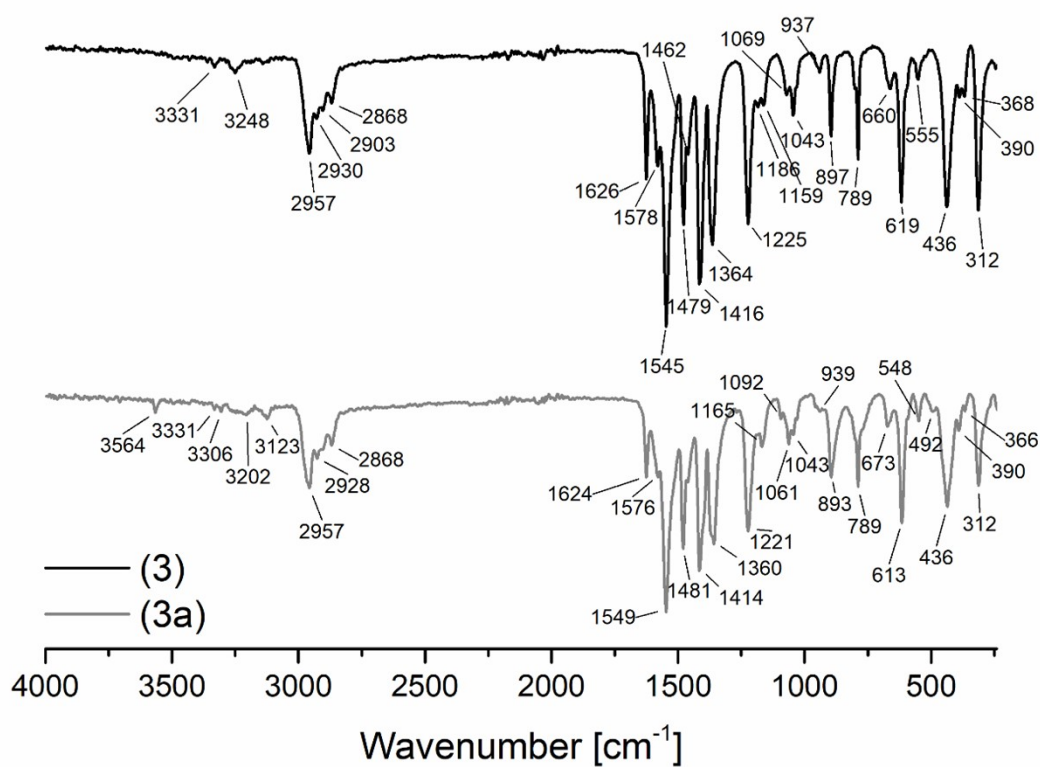

**Figure S7** ATR-IR spectrum for the compound  $[\text{Cu}_2(\text{iPrNH}_2)_2(\mu\text{-O}_2\text{C}^t\text{Bu})_4]_n$  (**3**) (black) and  $[\text{Cu}_3(\text{iPrNH}_2)_2(\mu_3\text{-OH})_2(\mu\text{-O}_2\text{C}^t\text{Bu})_4]_n$  (**3a**) (grey).

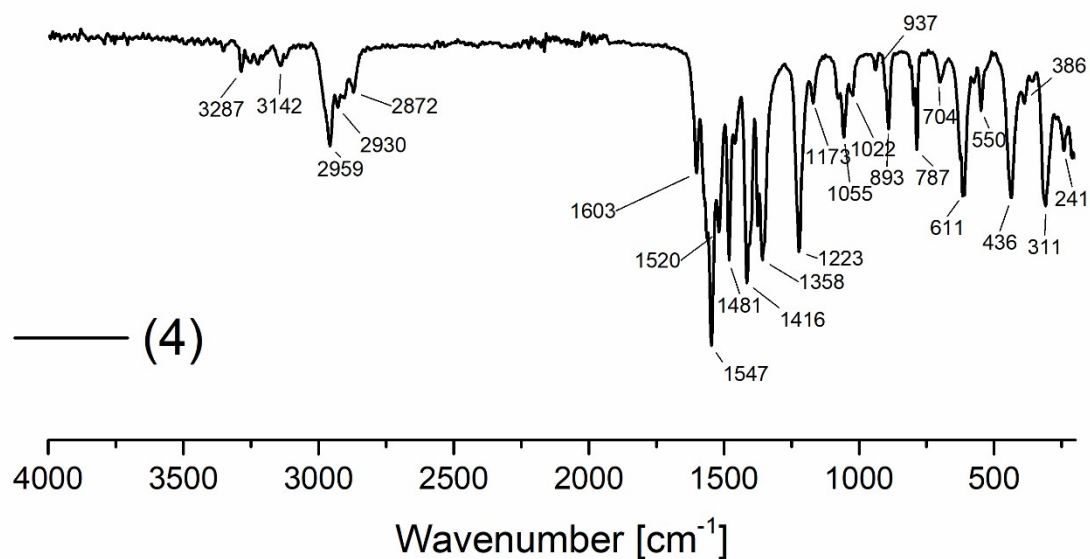

**Figure S8** ATR-IR spectrum for the compound  $[\text{Cu}_2(\text{EtNH}_2)_2(\mu\text{-O}_2\text{C}^t\text{Bu})_4]_n$  (**4**).

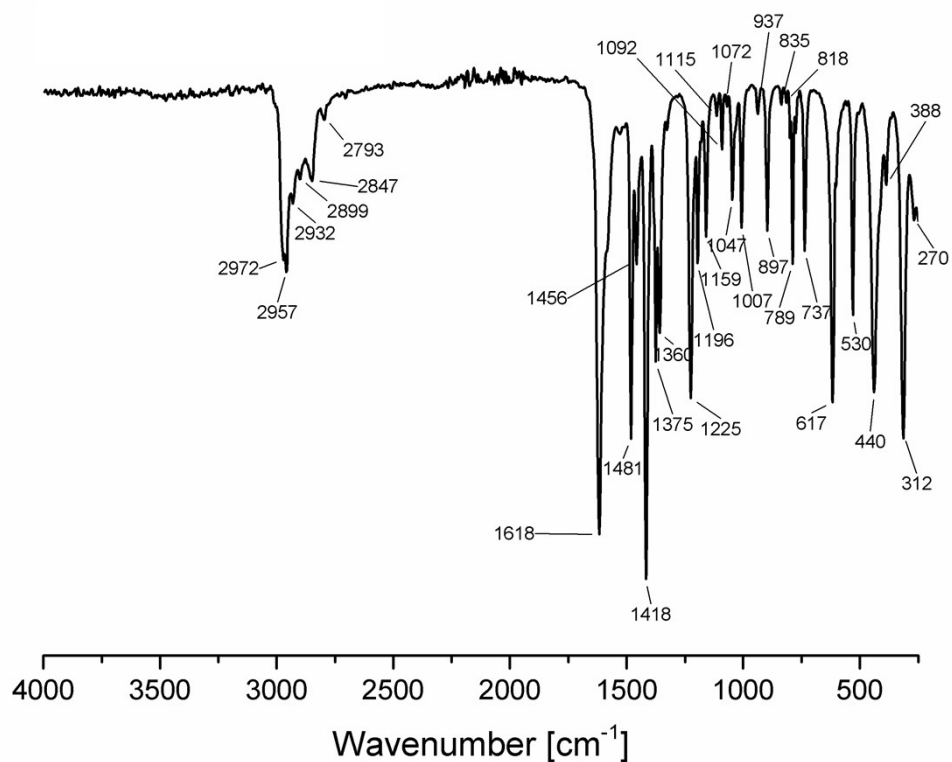

**Figure S9** ATR-IR spectrum for the compound  $[\text{Cu}_2(\text{Et}_3\text{N})_2(\mu\text{-O}_2\text{C}^t\text{Bu})_4]$  (**5**).

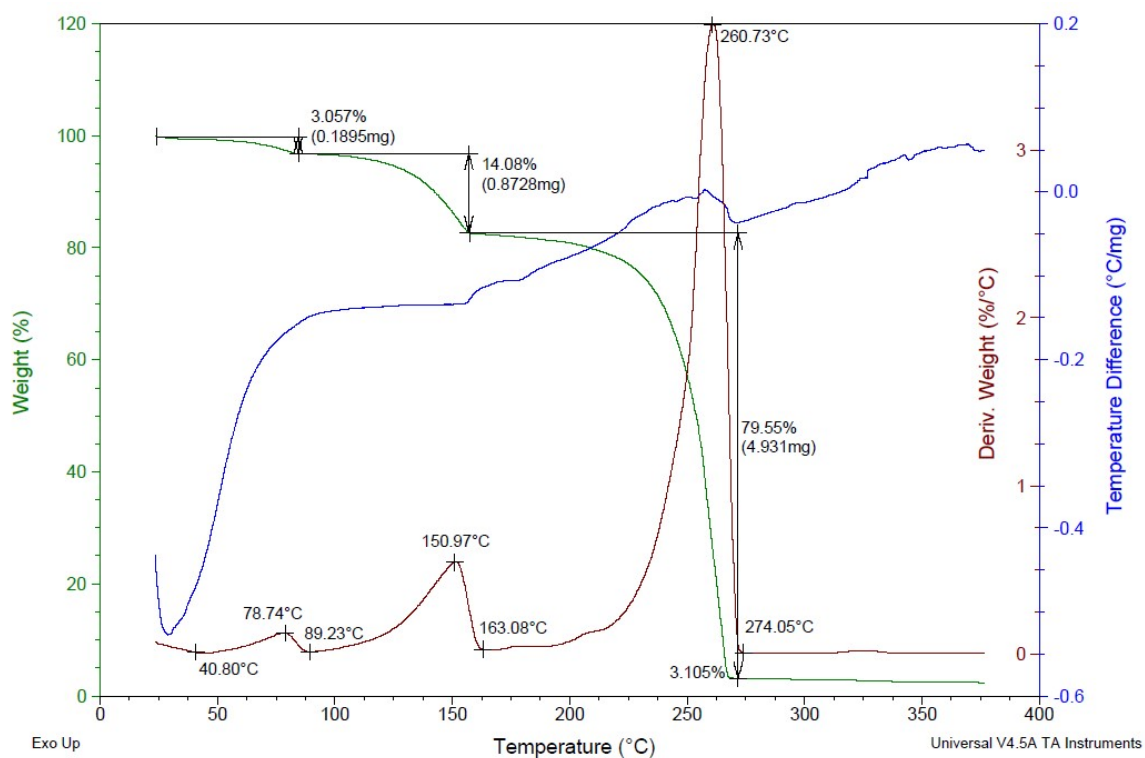

**Figure S10** Thermal decomposition of  $[\text{Cu}_2(^t\text{BuNH}_2)_2(\mu\text{-O}_2\text{C}^t\text{Bu})_4]_n$  (**1**) (TG, DTG, DTA curves).



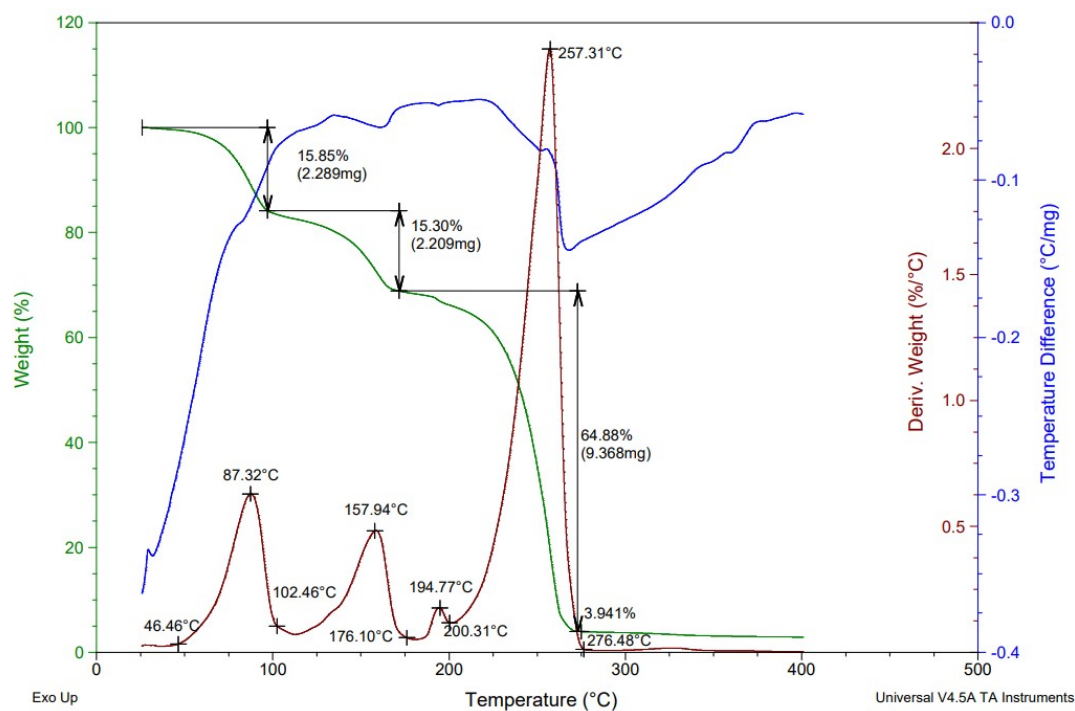

**Figure S11** Thermal decomposition of  $[\text{Cu}_2(\text{sBuNH}_2)_2(\mu\text{-O}_2\text{C}^t\text{Bu})_4]_n$  (**2**) (TG, DTG, DTA curves).

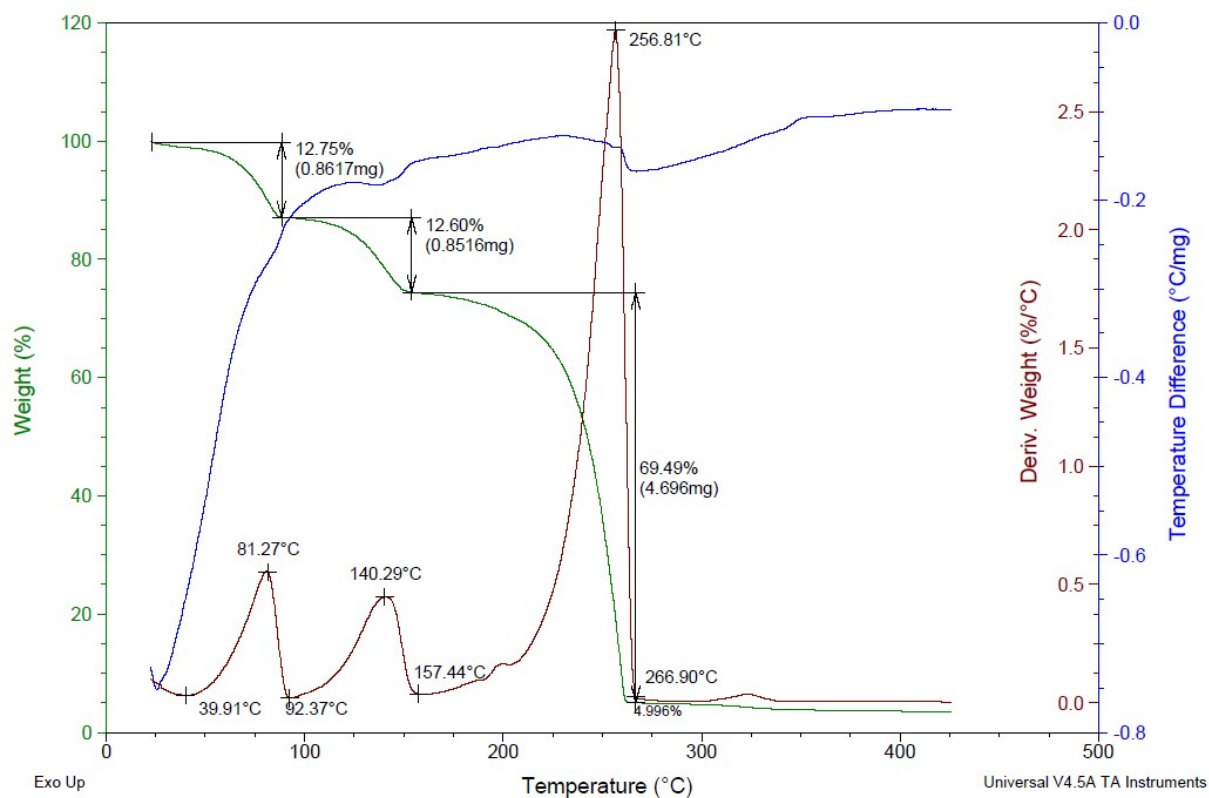

**Figure S12** Thermal decomposition of  $[\text{Cu}_2(\text{iPrNH}_2)_2(\mu\text{-O}_2\text{C}^t\text{Bu})_4]_n$  (**3**) (TG, DTG, DTA curves).

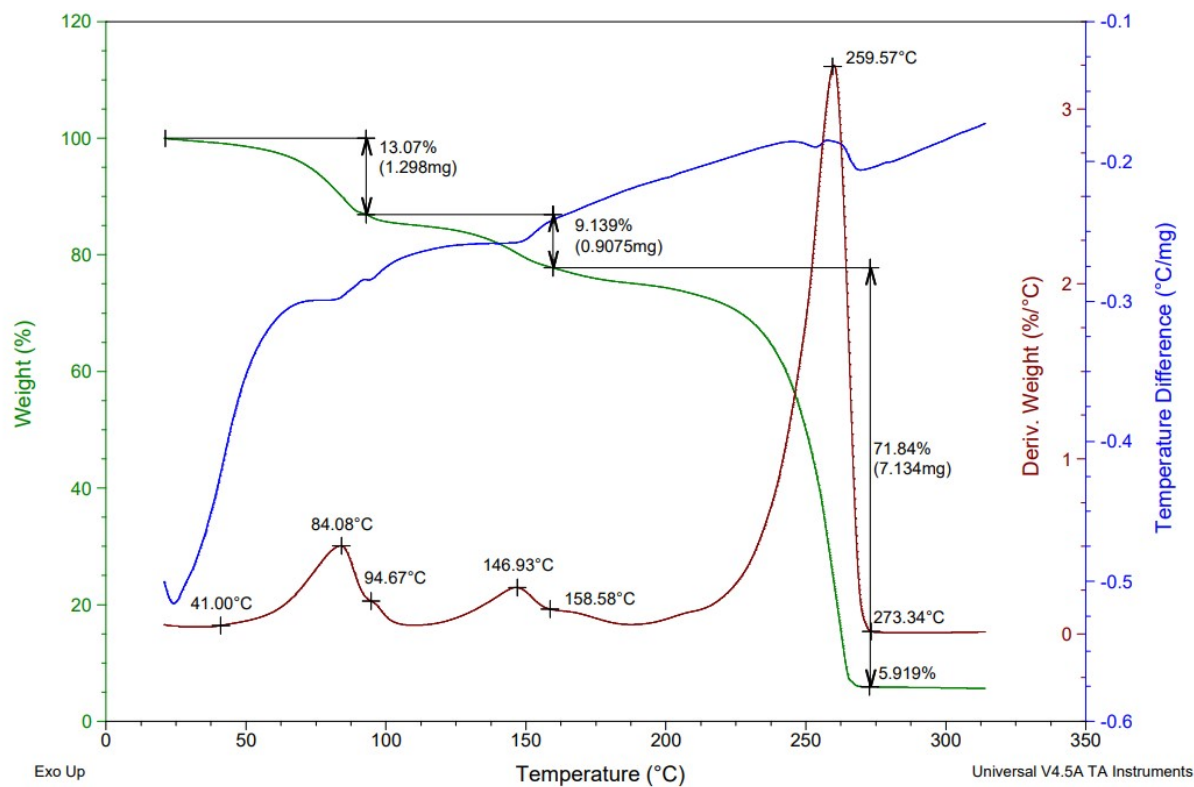

**Figure S13** Thermal decomposition of  $[\text{Cu}_2(\text{EtNH}_2)_2(\mu\text{-O}_2\text{C}^t\text{Bu})_4]_n$  (**4**) (TG, DTG, DTA curves).

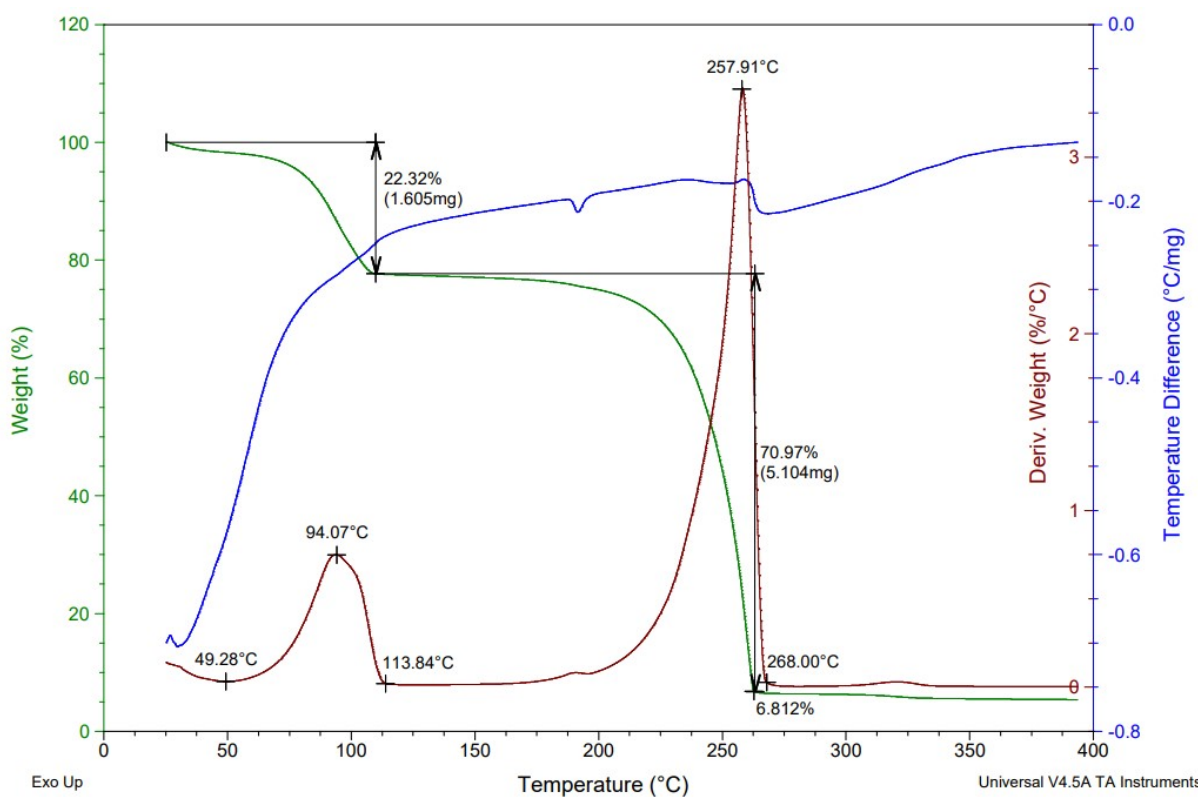

**Figure S14** Thermal decomposition of  $[\text{Cu}_2(\text{Et}_3\text{N})_2(\mu\text{-O}_2\text{C}^t\text{Bu})_4]$  (**5**) (TG, DTG, DTA curves).

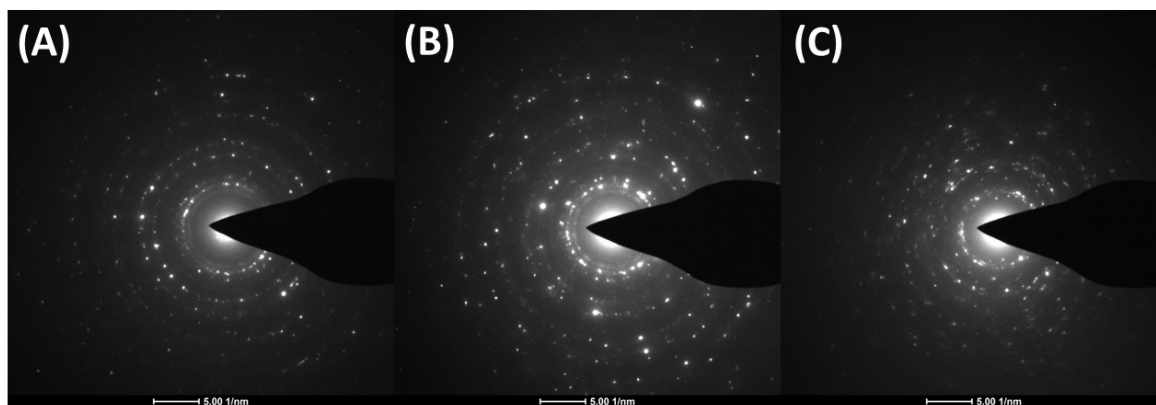

**Figure S15** Transmission electron microscope (TEM) diffraction pattern for the TGA final residue: (A)  $[\text{Cu}_2(\text{}^s\text{BuNH}_2)_2(\mu\text{-O}_2\text{C}^t\text{Bu})_4]_n$  (**2**), (B)  $[\text{Cu}_2(\text{}^i\text{PrNH}_2)_2(\mu\text{-O}_2\text{C}^t\text{Bu})_4]_n$  (**3**), and (C)  $[\text{Cu}_2(\text{Et}_3\text{N})_2(\mu\text{-O}_2\text{C}^t\text{Bu})_4]$  (**5**).

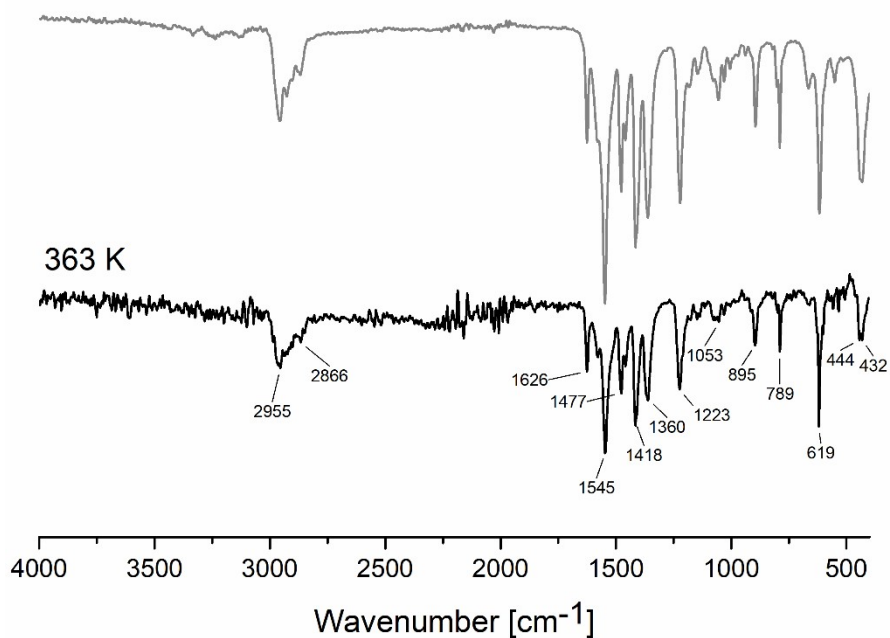

**Figure S16** Infrared spectra for the compound  $[\text{Cu}_2(\text{}^s\text{BuNH}_2)_2(\mu\text{-O}_2\text{C}^t\text{Bu})_4]_n$  (**2**) before (grey) and after sublimation (black) at 363 K ( $p = 10^{-2}$  mbar).



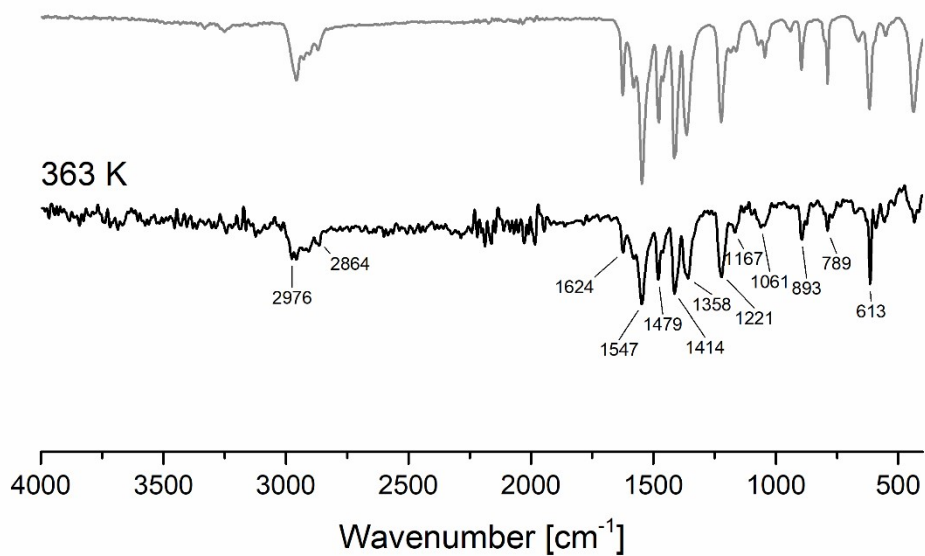

**Figure S17** Infrared spectra for the compound  $[\text{Cu}_2(\text{}^i\text{PrNH}_2)_2(\mu\text{-O}_2\text{C}^t\text{Bu})_4]_n$  (**3**) before (grey) and after sublimation (black) at 363 K ( $p = 10^{-2}$  mbar).

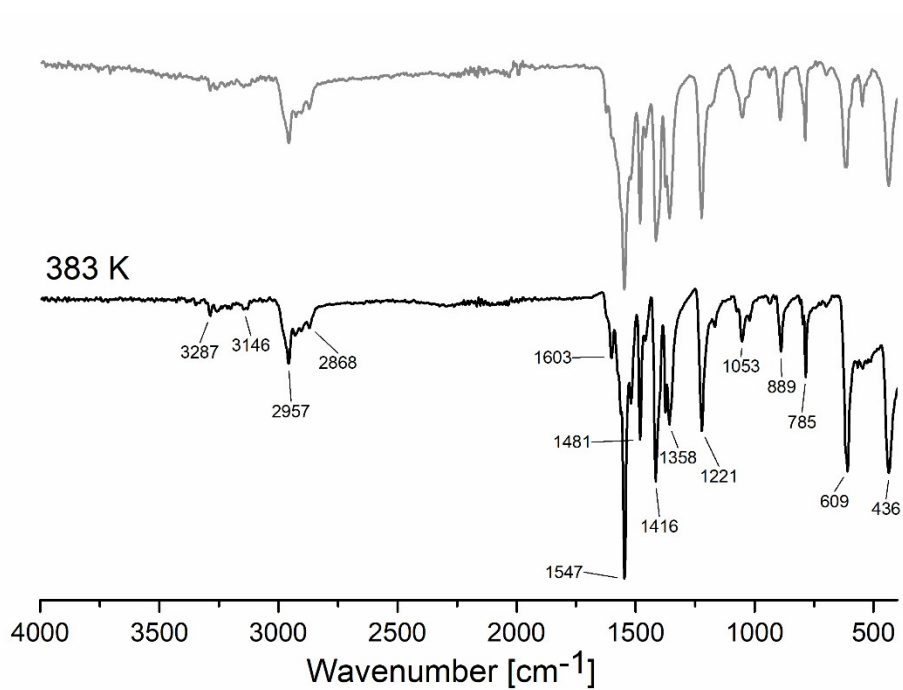

**Figure S18** Infrared spectra for the compound  $[\text{Cu}_2(\text{EtNH}_2)_2(\mu\text{-O}_2\text{C}^t\text{Bu})_4]_n$  (**4**) before (grey) and after sublimation (black) at 383 K ( $p = 10^{-2}$  mbar).

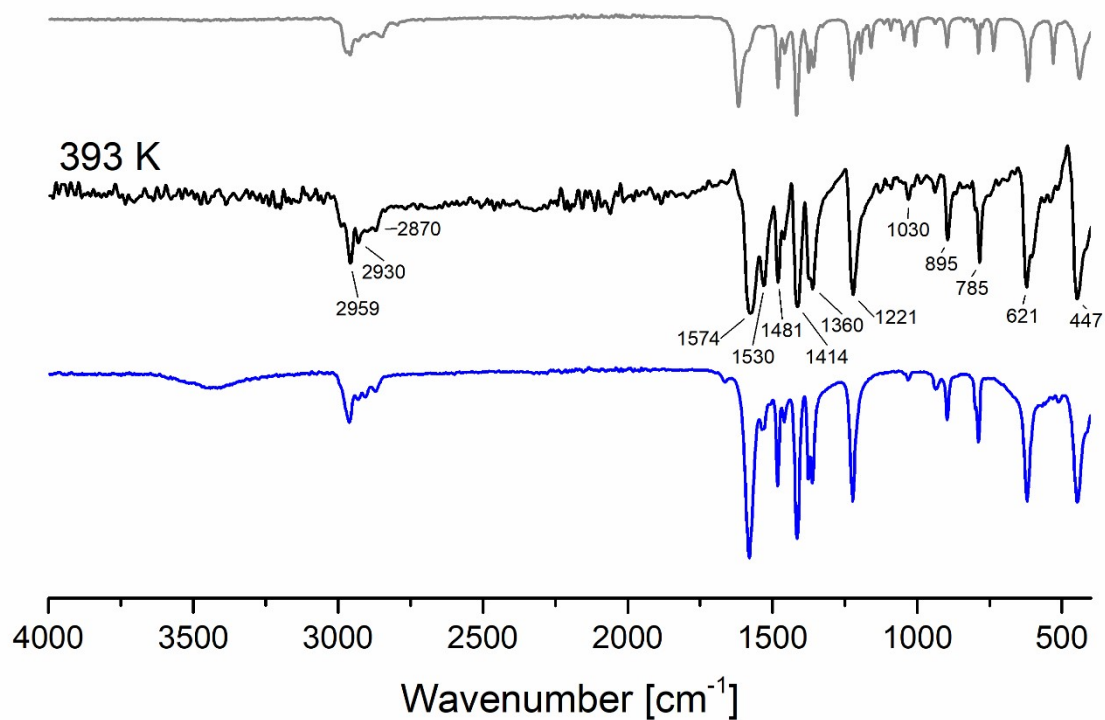

**Figure S19** Infrared spectra for the compound  $[\text{Cu}_2(\text{Et}_3\text{N})_2(\mu\text{-O}_2\text{C}^t\text{Bu})_4]$  (**5**) before (grey) and after sublimation attempt (black) at 393 K ( $p = 10^{-2}$  mbar),  $[\text{Cu}_2(\mu\text{-O}_2\text{C}^t\text{Bu})_4]_n$  (**0**) (blue).

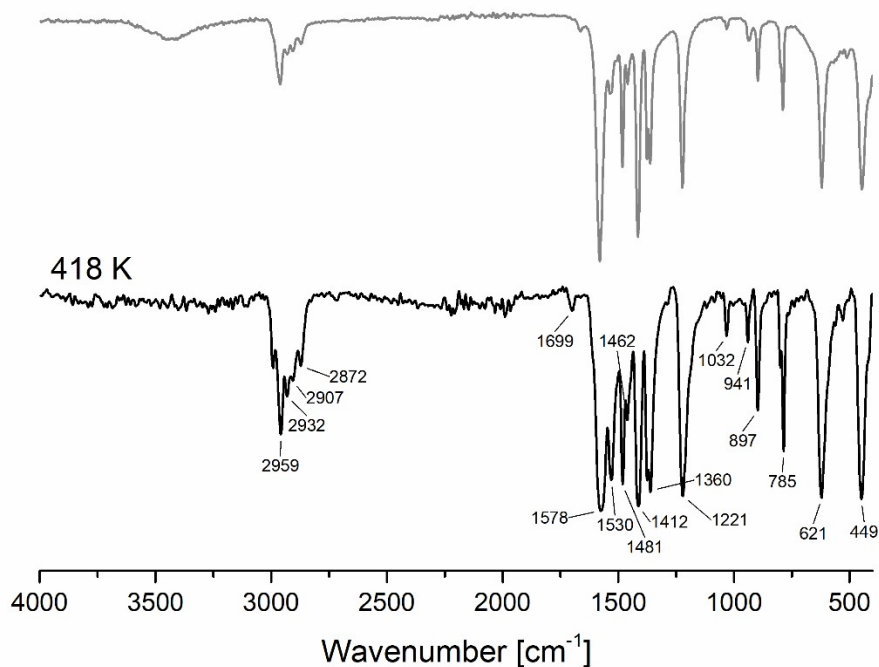

**Figure S20** Infrared spectra for the compound  $[\text{Cu}_2(\mu\text{-O}_2\text{C}^t\text{Bu})_4]_n$  (**0**) before (grey) and after sublimation (black) at 418 K ( $p = 10^{-2}$  mbar).

**Table S6** Mass spectrometry with electron ionization (EI MS) results for the complex  $[\text{Cu}_2(\text{}^t\text{BuNH}_2)_2(\mu\text{-O}_2\text{C}^t\text{Bu})_4]$  (**1**).

| Fragments                                                                  | <i>m/z</i> | Relative Intensity (RI) [%] |       |       |       |       |
|----------------------------------------------------------------------------|------------|-----------------------------|-------|-------|-------|-------|
|                                                                            |            | 350 K                       | 370 K | 417 K | 487 K | 525 K |
| $[\text{C}_2\text{H}_2\text{N}]^+ / [\text{CH}_2=\text{C}=\text{CH}_2]^+$  | 40         | 6                           | 11    | 45    | 50    | 40    |
| $[\text{C}_2\text{H}_3\text{N}]^+ / [\text{CH}_2=\text{CH}-\text{CH}_2]^+$ | 41         | 1                           | 21    | 8     | 10    | –     |
| $[\text{C}_2\text{H}_4\text{N}]^+ / [\text{CH}_2\text{CO}]^+$              | 42         | 26                          | 35    | 92    | 94    | 88    |
| $[\text{CO}_2]^+$                                                          | 44         | 3                           | 1     | 2     | 8     | –     |
| $[\text{C}_2\text{H}_7\text{N}]^+ / [\text{COOH}]^+$                       | 45         | 1                           | –     | 33    | 100   | 25    |
| $[(\text{CH}_3)_2\text{C}=\text{CH}_2]^+$                                  | 56         | 2                           | 2     | 12    | 21    | –     |
| $[\text{}^t\text{Bu}]^+$                                                   | 57         | 4                           | 1     | 29    | 24    | –     |
| $[\text{C}_3\text{H}_8\text{N}]^+ / [\text{C}_4\text{H}_{10}]^+$           | 58         | 48                          | 100   | 100   | 99    | 100   |
| $[\text{C}_3\text{H}_9\text{N}]^+$                                         | 59         | 100                         | 26    | 5     | 5     | 8     |
| $[\text{Cu}]^+$                                                            | 63         | 1                           | 11    | 1     | –     | –     |
| $[\text{C}_3\text{H}_7\text{CO}_2]^+$                                      | 87         | 1                           | –     | 5     | 5     | –     |
| $[\text{CuCO}_2]^+$                                                        | 107        | 1                           | 6     | –     | –     | –     |
| $[\text{Cu}_2(\text{}^t\text{Bu})]^+$                                      | 183        | 3                           | 2     | 8     | –     | –     |
| $[\text{Cu}_2(\text{O}_2\text{C}^t\text{Bu})]^+$                           | 227        | 14                          | 27    | 36    | –     | –     |
| $[\text{Cu}_2(\text{O}_2\text{C}^t\text{Bu})_2]^+$                         | 328        | 12                          | 25    | 23    | –     | –     |
| $[\text{Cu}_3(\text{O}_2\text{C}^t\text{Bu})_2]^+$                         | 393        | –                           | 6     | –     | –     | –     |
| $[\text{Cu}_3(\text{O}_2\text{C}^t\text{Bu})_5]^+$                         | 696        | 1                           | 4     | –     | –     | –     |

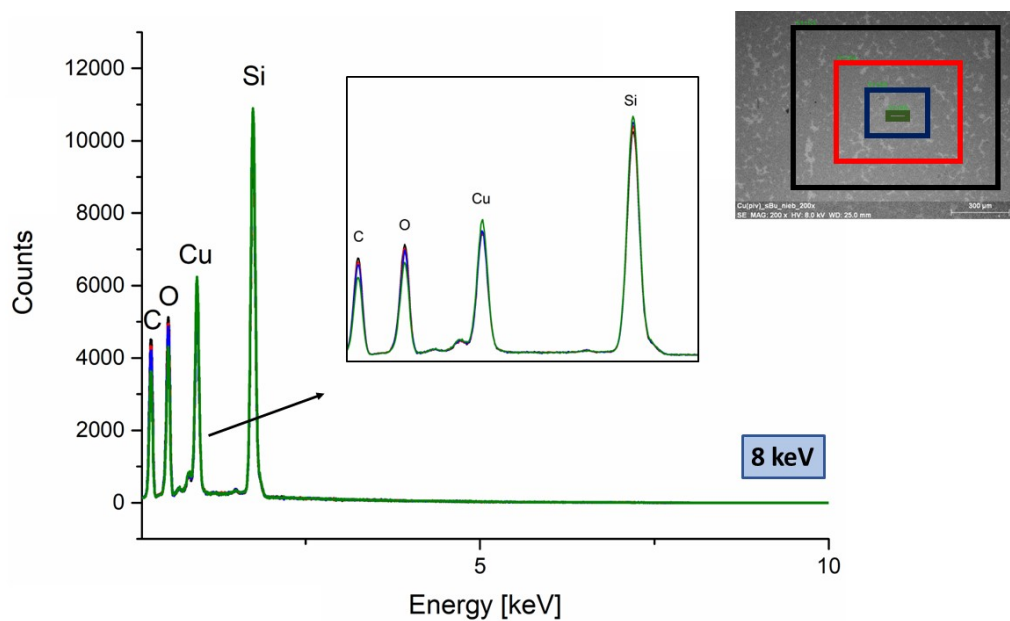

**Figure S21** Examined scan areas' EDX spectra (8 keV) for  $[\text{Cu}_2(\text{sBuNH}_2)_2(\mu\text{-O}_2\text{C}^t\text{Bu})_4]_n$  (2) layer on a silicon wafer.

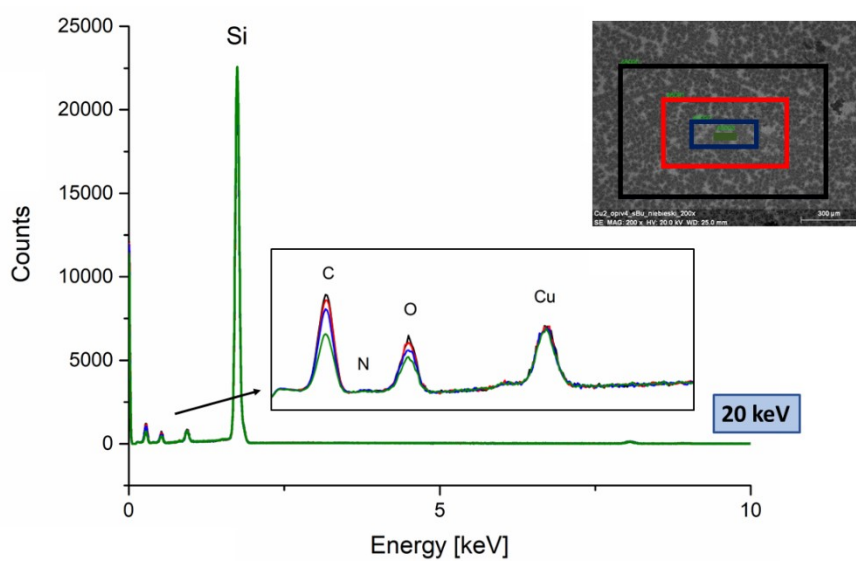

**Figure S22** Examined scan areas' EDX spectra (20 keV) for  $[\text{Cu}_2(\text{sBuNH}_2)_2(\mu\text{-O}_2\text{C}^t\text{Bu})_4]_n$  (2) layer on a silicon wafer.

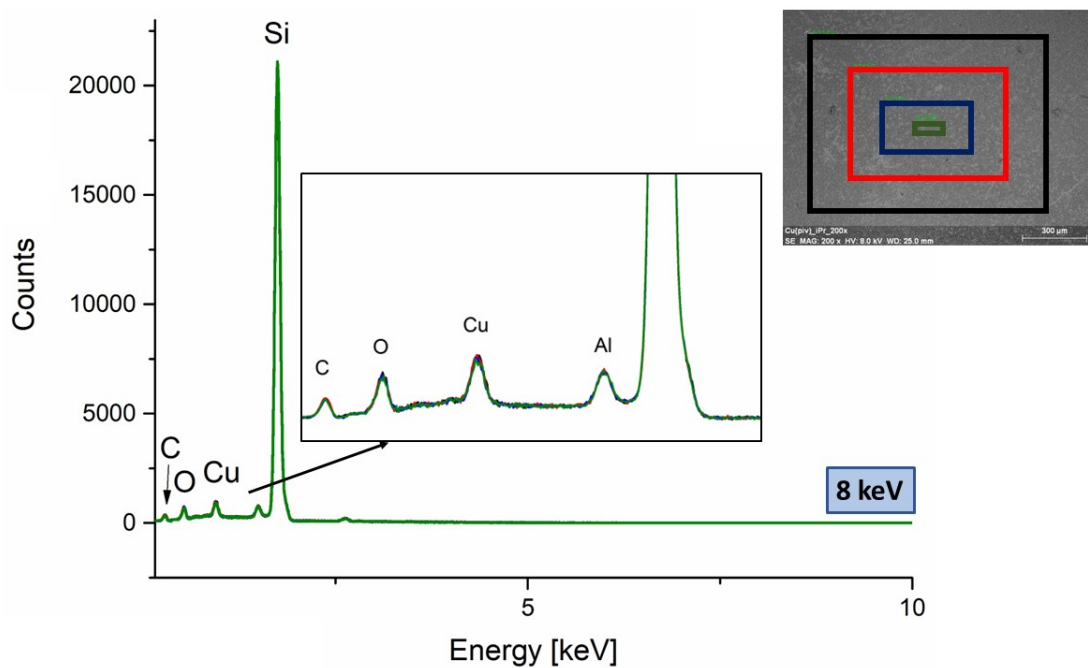

**Figure S23** Examined scan areas' EDX spectra (8 keV) for  $[\text{Cu}_2(\text{iPrNH}_2)_2(\mu\text{-O}_2\text{C}^t\text{Bu})_4]_n$  (**3**) layer on a silicon wafer.

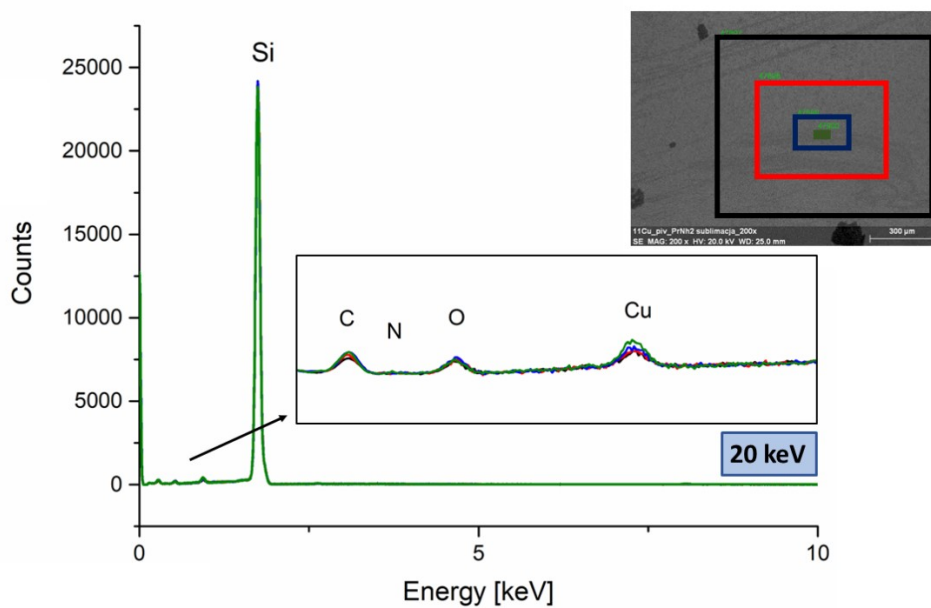

**Figure S24** Examined scan areas' EDX spectra (20 keV) for  $[\text{Cu}_2(\text{iPrNH}_2)_2(\mu\text{-O}_2\text{C}^t\text{Bu})_4]_n$  (**3**) layer on a silicon wafer.

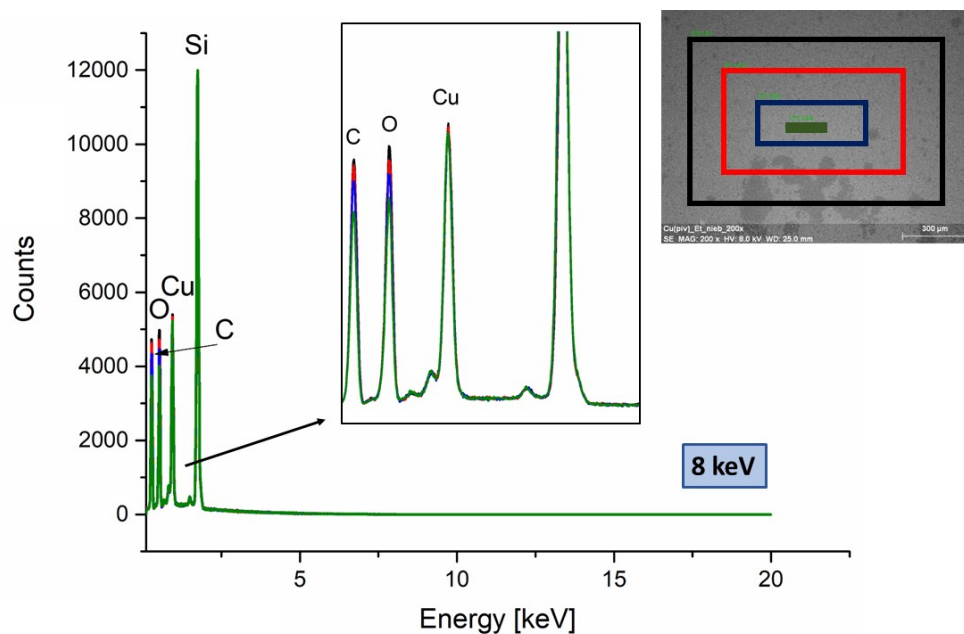

**Figure S25** Examined scan areas' EDX spectra (8 keV) for  $[\text{Cu}_2(\text{EtNH}_2)_2(\mu\text{-O}_2\text{C}'\text{Bu})_4]_n$  (**4**) layer on a silicon wafer.

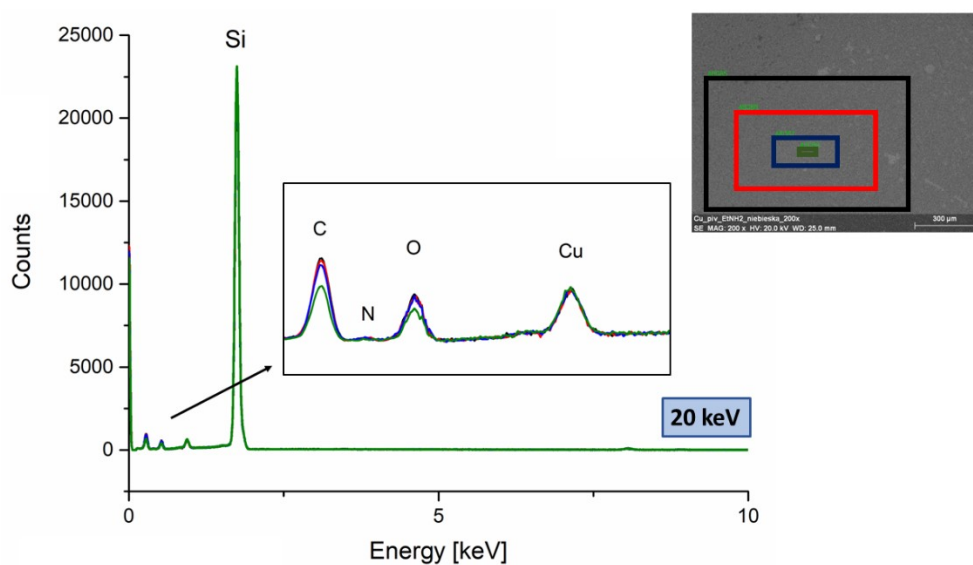

**Figure S26** Examined scan areas' EDX spectra (20 keV) for  $[\text{Cu}_2(\text{EtNH}_2)_2(\mu\text{-O}_2\text{C}'\text{Bu})_4]_n$  (**4**) layer on a silicon wafer.

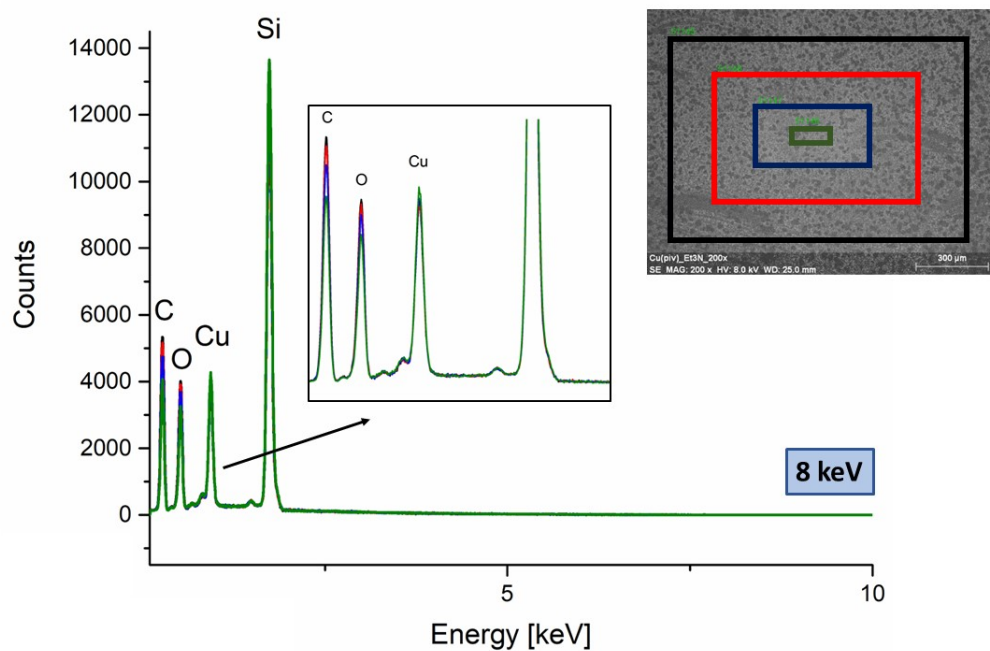

**Figure S27** Examined scan areas' EDX spectra (8 keV) for  $[\text{Cu}_2(\text{Et}_3\text{N})_2(\mu\text{-O}_2\text{C}^t\text{Bu})_4]$  (5) layer on a silicon wafer.

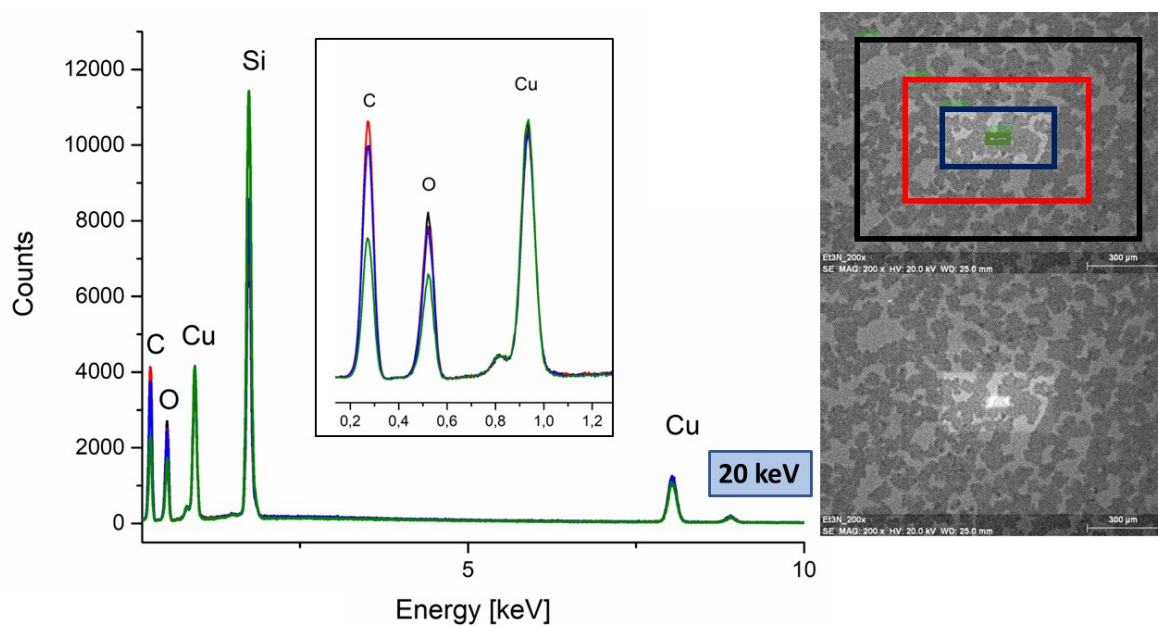

**Figure S28** Examined scan areas' EDX spectra (20 keV) for  $[\text{Cu}_2(\text{Et}_3\text{N})_2(\mu\text{-O}_2\text{C}^t\text{Bu})_4]$  (5) layer on a silicon wafer.



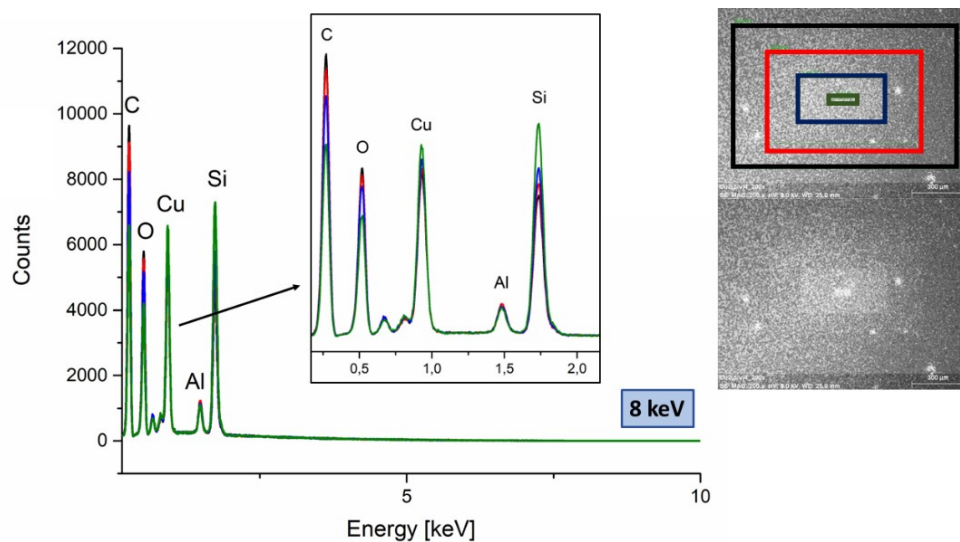

**Figure S29** Examined scan areas' EDX spectra (8 keV) for  $[\text{Cu}_2(\mu\text{-O}_2\text{C}^t\text{Bu})_4]_n$  (**0**) layer on a silicon wafer.

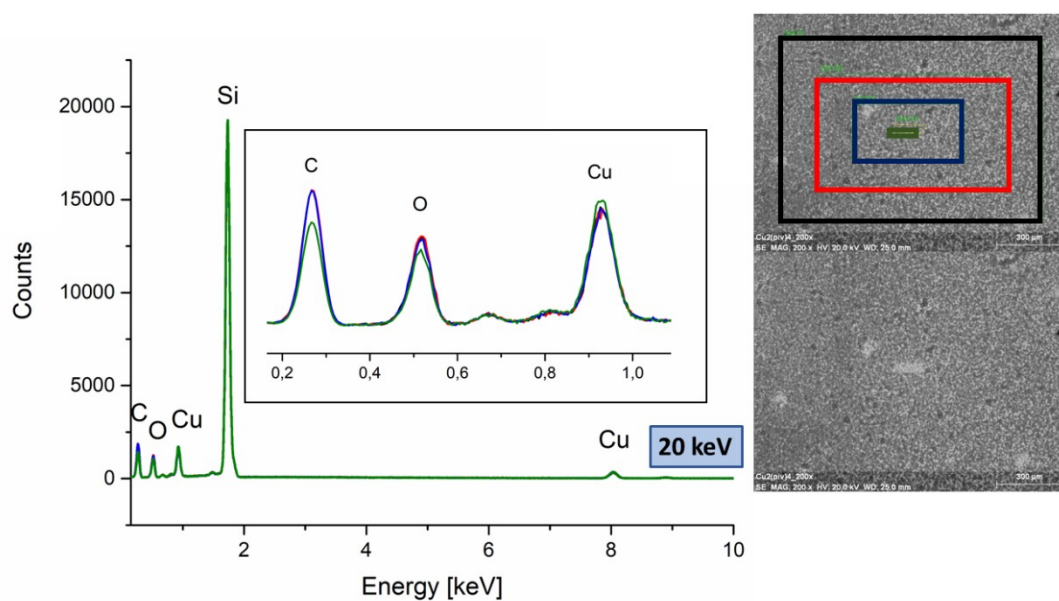

**Figure S30** Examined scan areas' EDX spectra (20 keV) for  $[\text{Cu}_2(\mu\text{-O}_2\text{C}^t\text{Bu})_2]_n$  (**0**) layer on a silicon wafer.



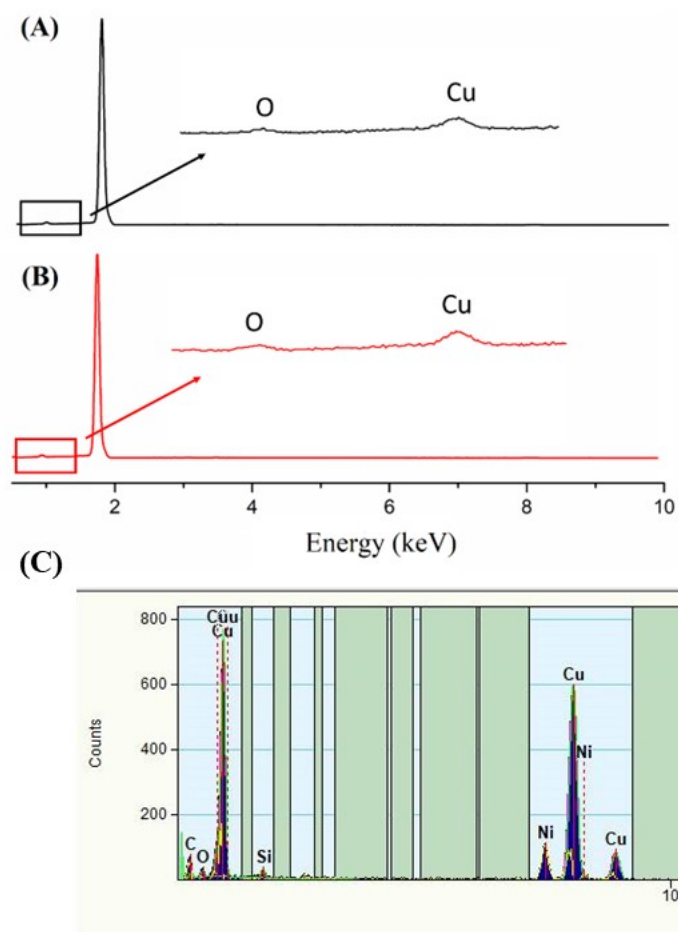

**Figure S31** Composition analysis of the obtained materials using  $[\text{Cu}_2(\text{}^t\text{BuNH}_2)_2(\mu\text{-O}_2\text{C}^t\text{Bu})_4]_n$  (**1**), (A) for deposit obtained on the second substrate, (B) for deposit obtained on the fourth substrate, (C) EDX spectra from TEM obtained on the fourth substrate.

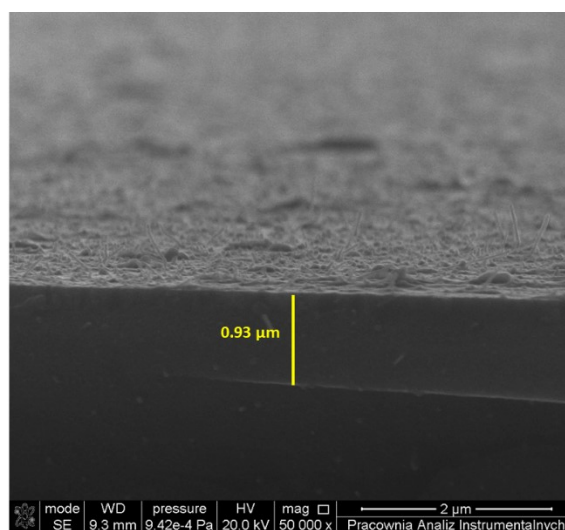

**Figure S32** SEM image to show the thickness of the copper layer obtained materials using  $[\text{Cu}_2(\text{}^t\text{BuNH}_2)_2(\mu\text{-O}_2\text{C}^t\text{Bu})_4]_n$  (**1**) for deposit obtained on the second substrate.
